# Supplementary material
Source: PubMed Central journal article supplement (PMC6804313)

# Supporting Information

## Ion Pair-Directed Borylation of Aromatic Phosponium Salts

Bernadette Lee, Madalina T. Mihai, Violeta Stojalnikova and Robert J. Phipps\*

Department of Chemistry, University of Cambridge, Lensfield Road, Cambridge, CB2 1EW, UK.

### Table of Contents

|            |                                               |           |
|------------|-----------------------------------------------|-----------|
| <b>1.1</b> | <b>NMR data for substrates.....</b>           | <b>1</b>  |
| <b>1.2</b> | <b>NMR data for borylation products .....</b> | <b>20</b> |
| <b>1.3</b> | <b>NMR data for Scheme 4.....</b>             | <b>34</b> |
| <b>1.4</b> | <b>NMR data for Scheme 5.....</b>             | <b>39</b> |

## 1.1 NMR data for substrates

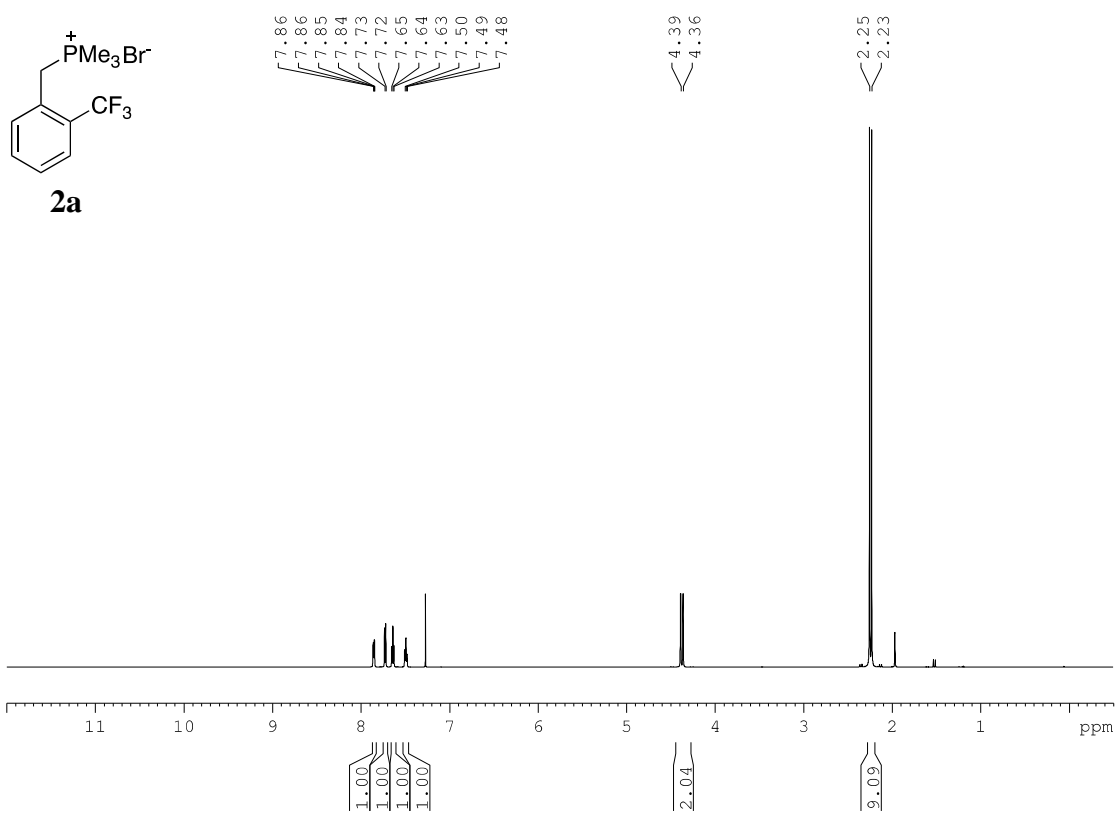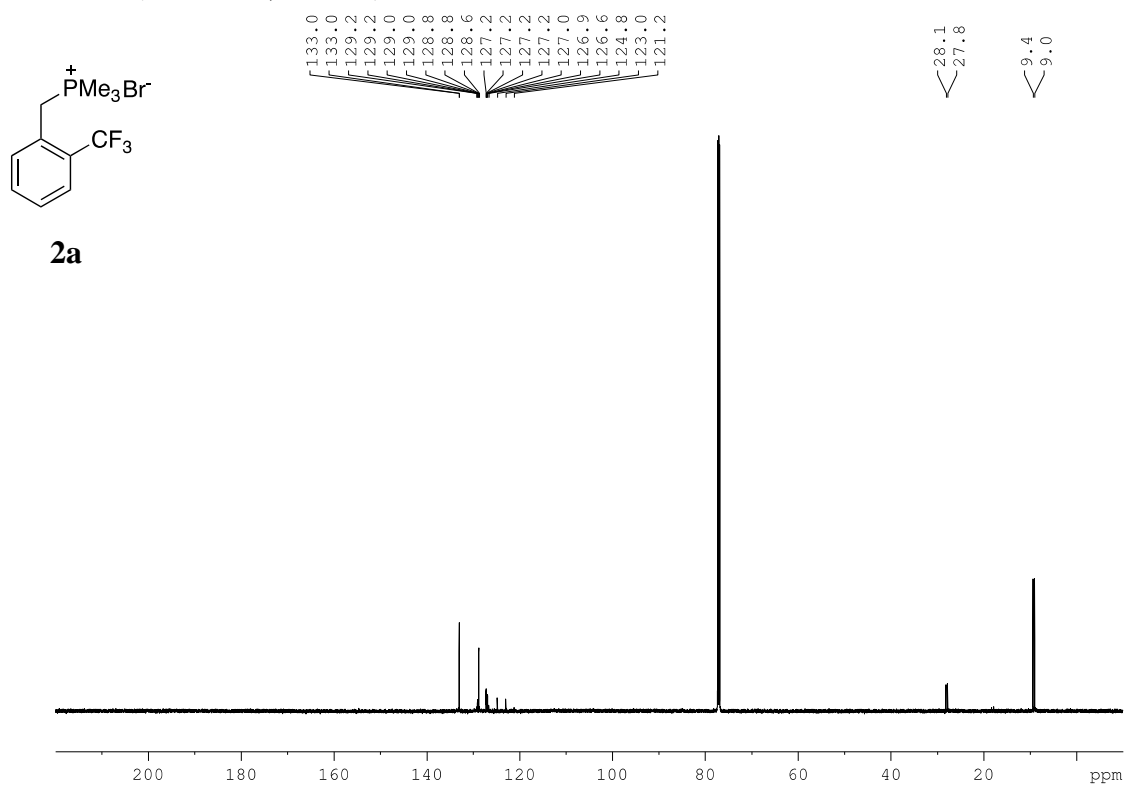

**<sup>1</sup>H NMR (600 MHz, CDCl<sub>3</sub>)**

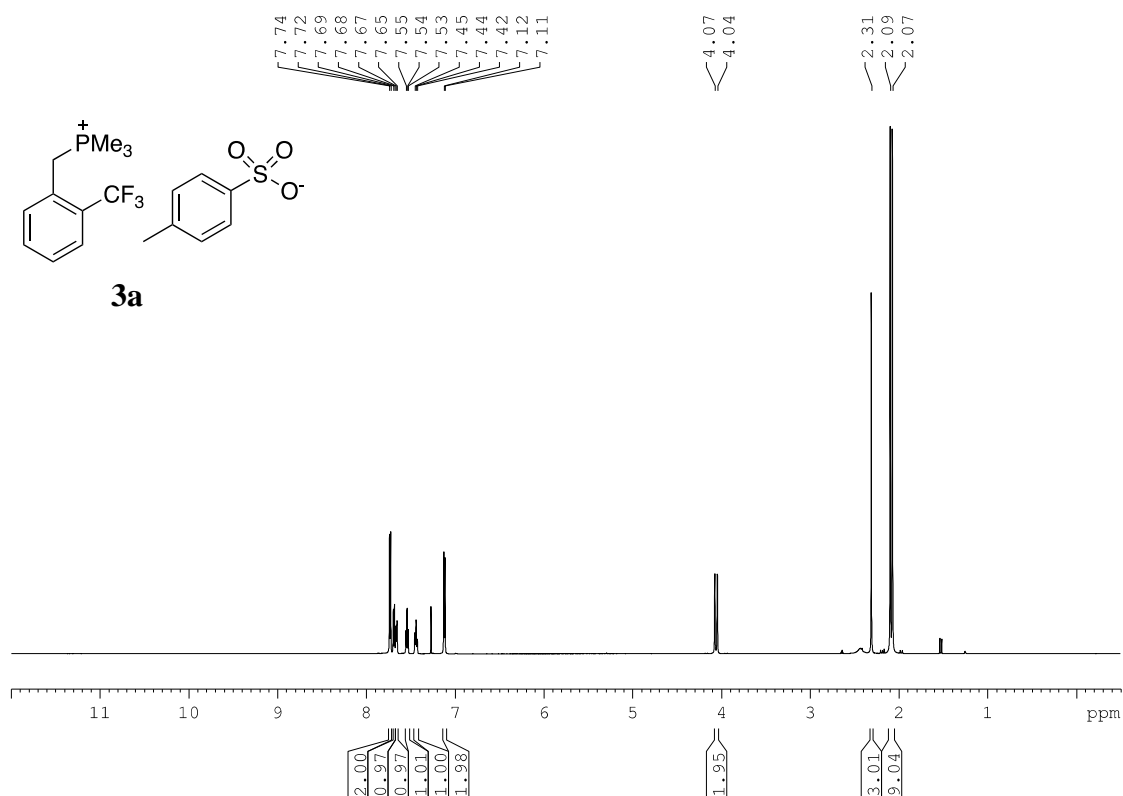

**<sup>13</sup>C NMR (101 MHz, CDCl<sub>3</sub>)**

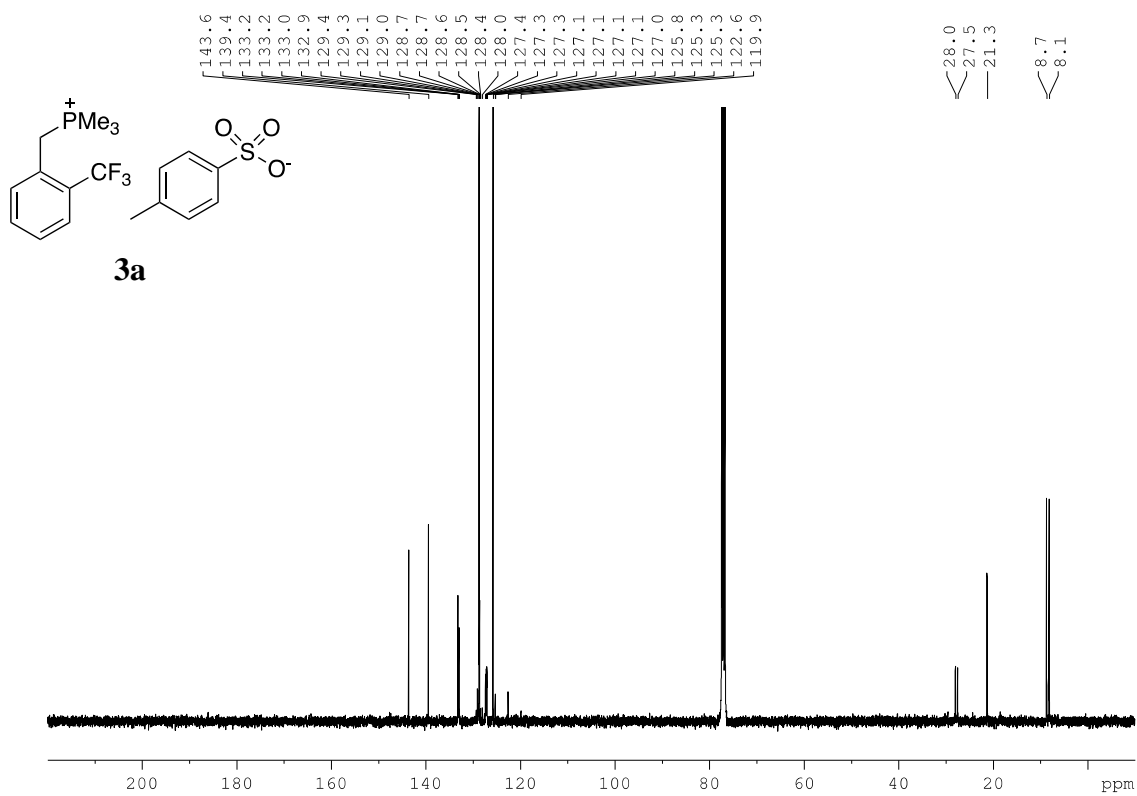

**<sup>1</sup>H NMR (600 MHz, CDCl<sub>3</sub>)**

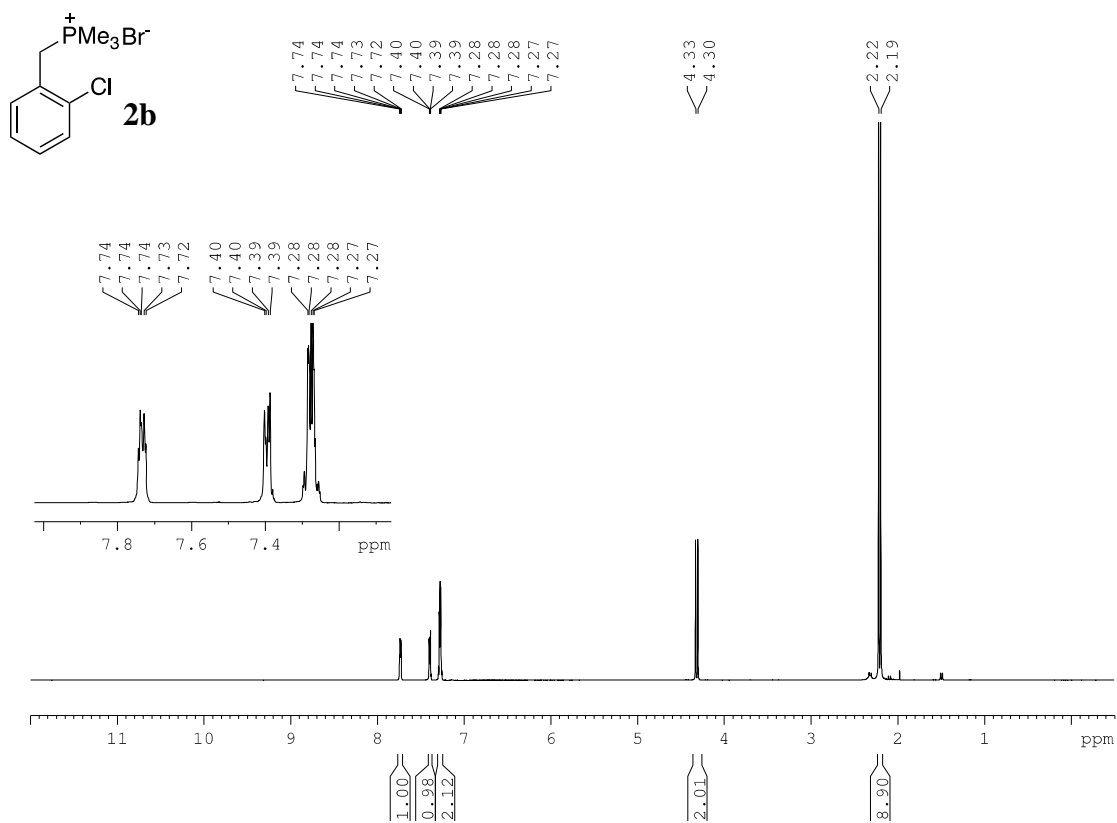

**<sup>13</sup>C NMR (151 MHz, CDCl<sub>3</sub>)**

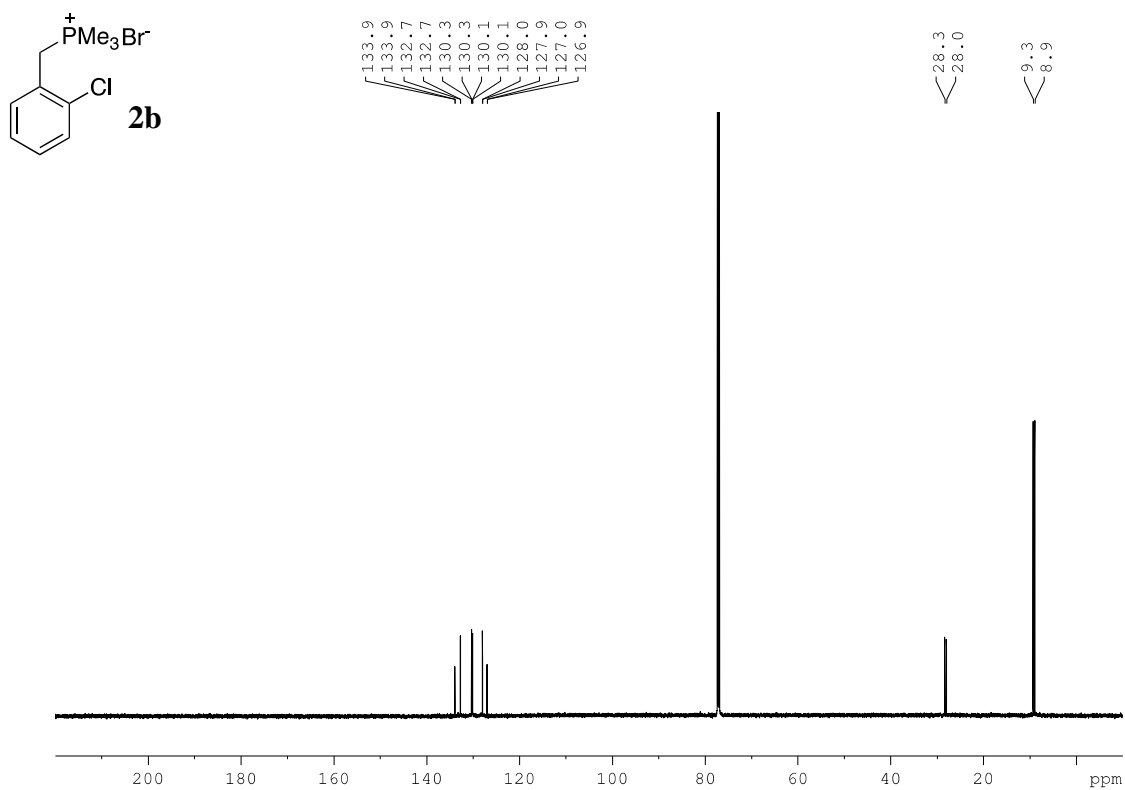

### $^1\text{H}$ NMR (600 MHz, $\text{CDCl}_3$ )

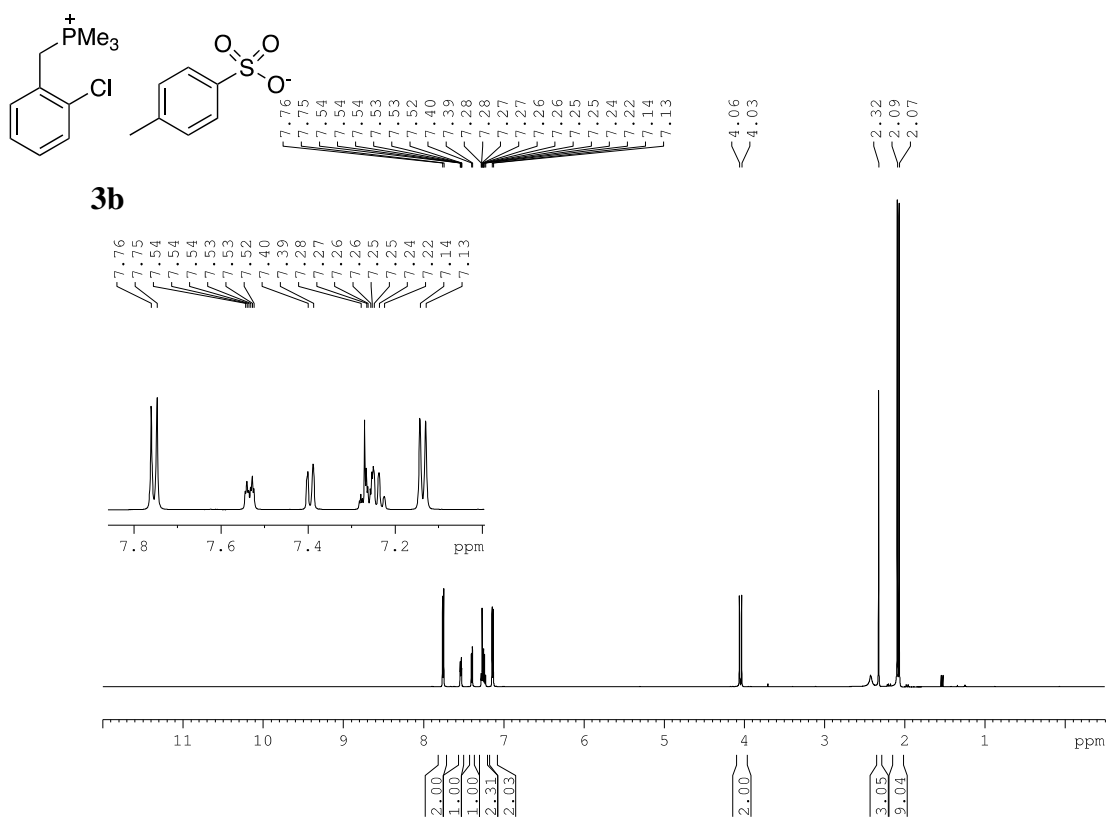

### $^{13}\text{C}$ NMR (151 MHz, $\text{CDCl}_3$ )

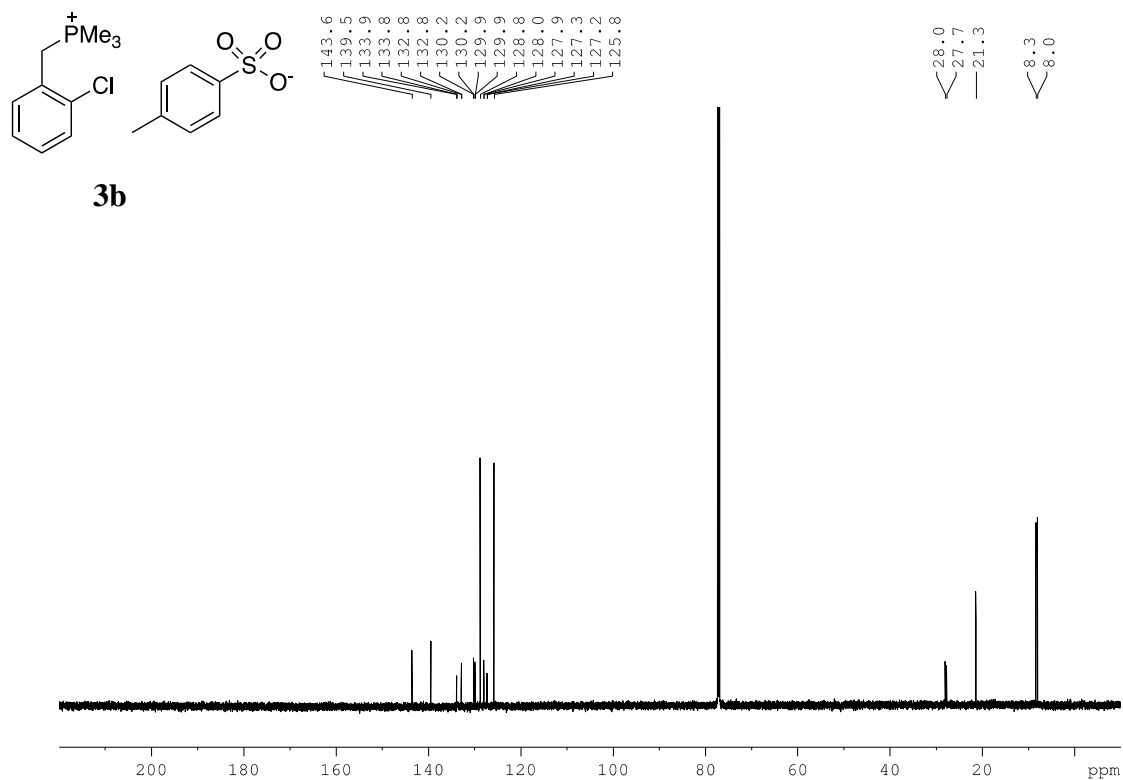

### $^1\text{H}$ NMR (600 MHz, $\text{CDCl}_3$ )

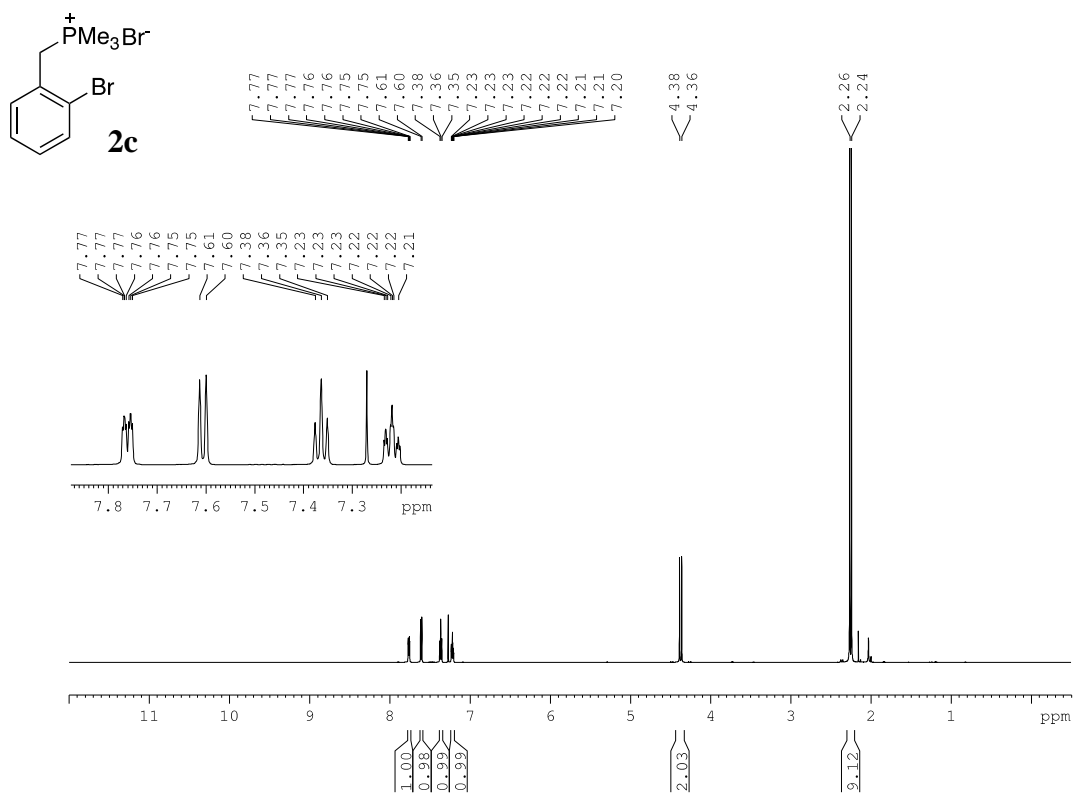

### $^{13}\text{C}$ NMR (151 MHz, $\text{CDCl}_3$ )

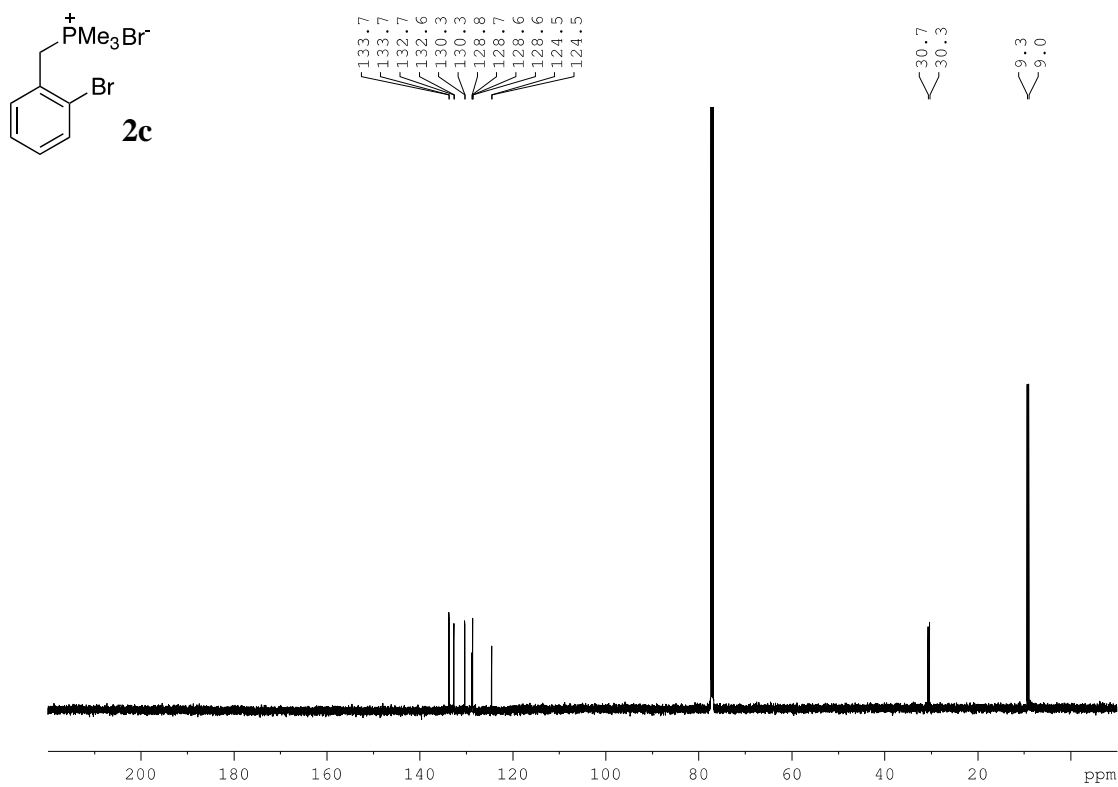

**$^1\text{H}$  NMR (600 MHz,  $\text{CDCl}_3$ )**

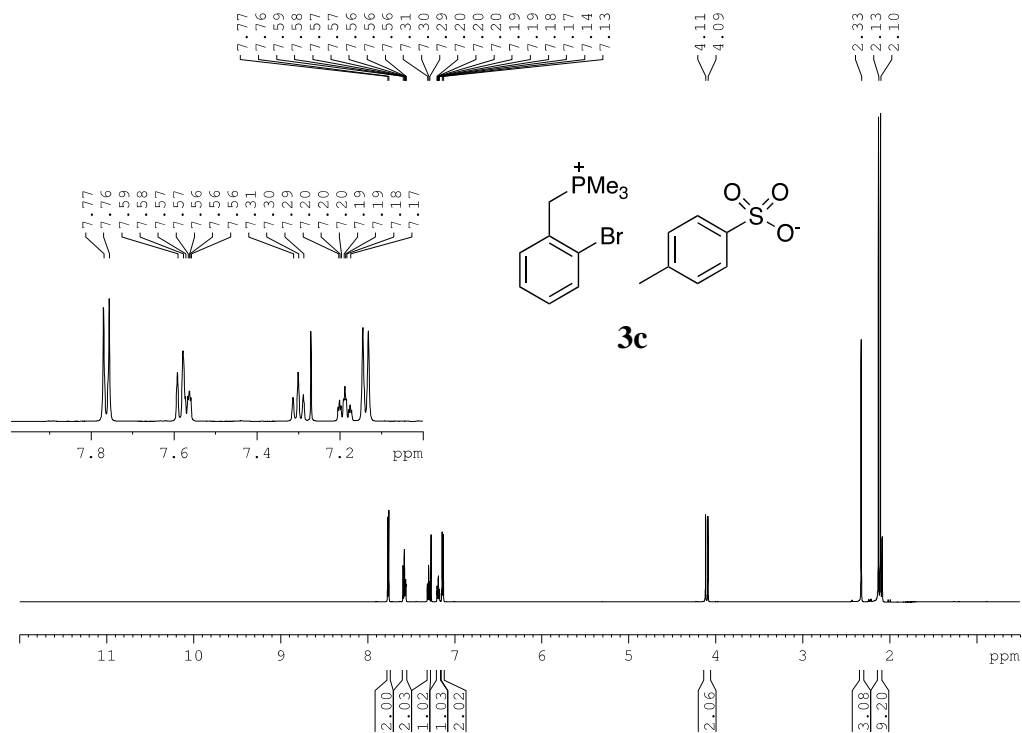

**$^{13}\text{C}$  NMR (151 MHz,  $\text{CDCl}_3$ )**

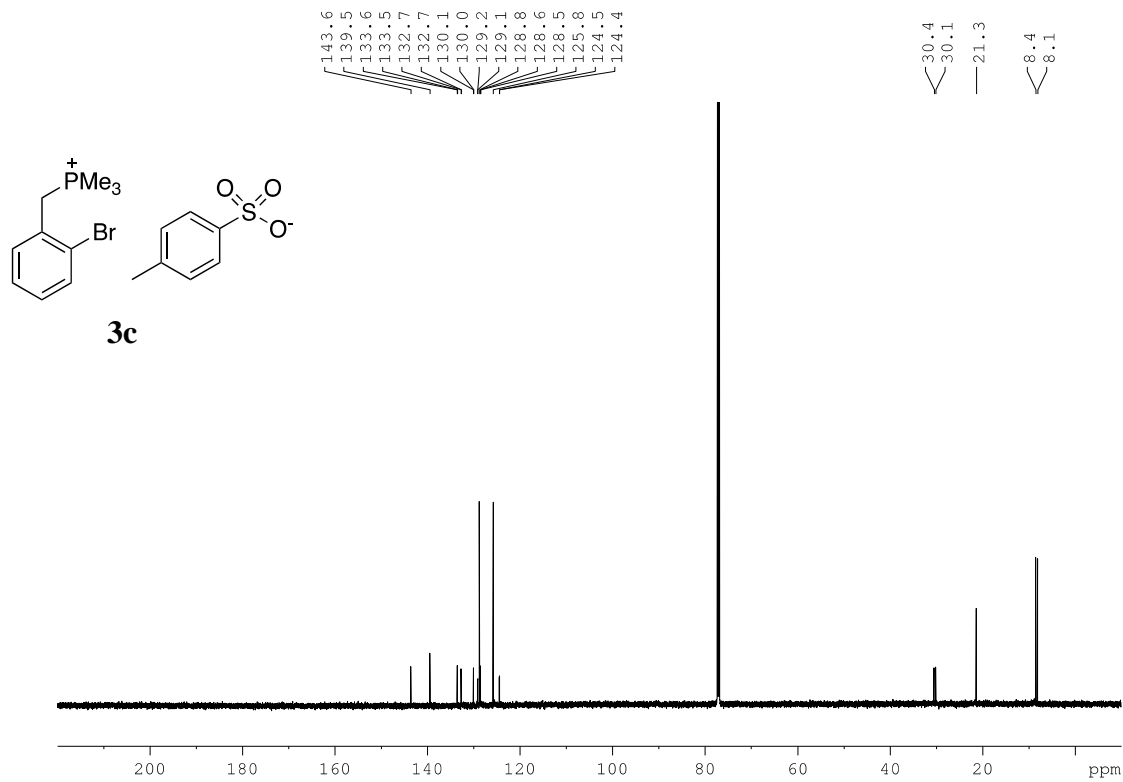

### $^1\text{H}$ NMR (600 MHz, $\text{CDCl}_3$ )

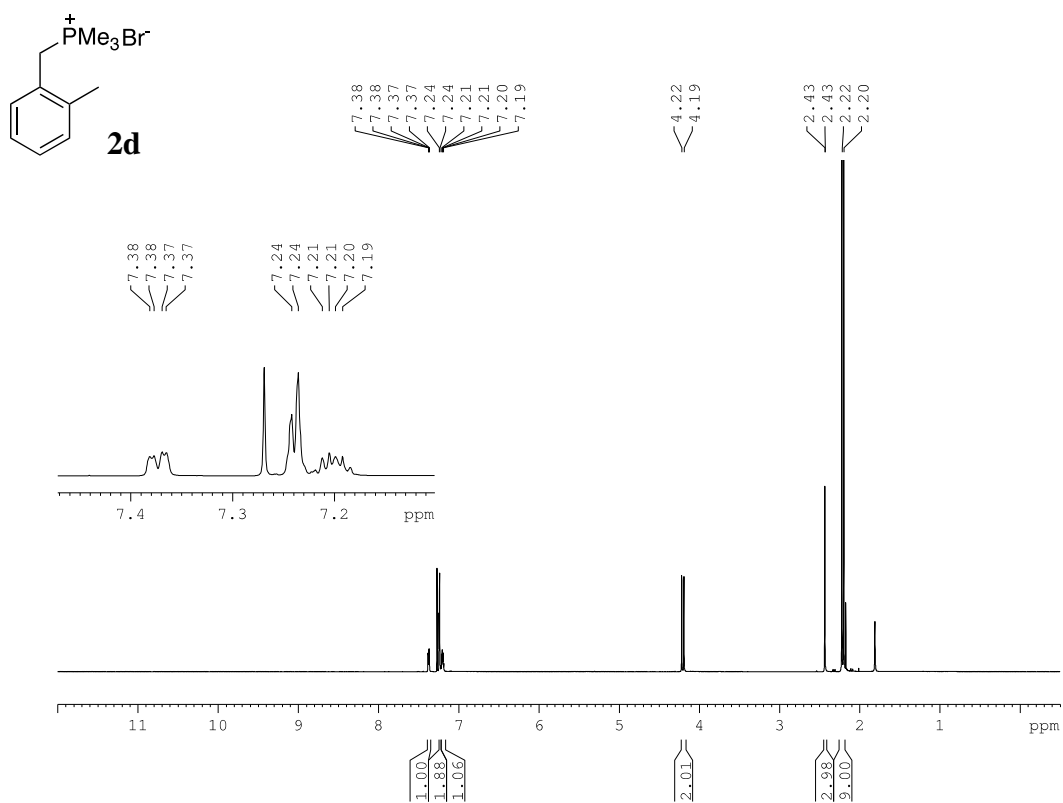

### $^{13}\text{C}$ NMR (151 MHz, $\text{CDCl}_3$ )

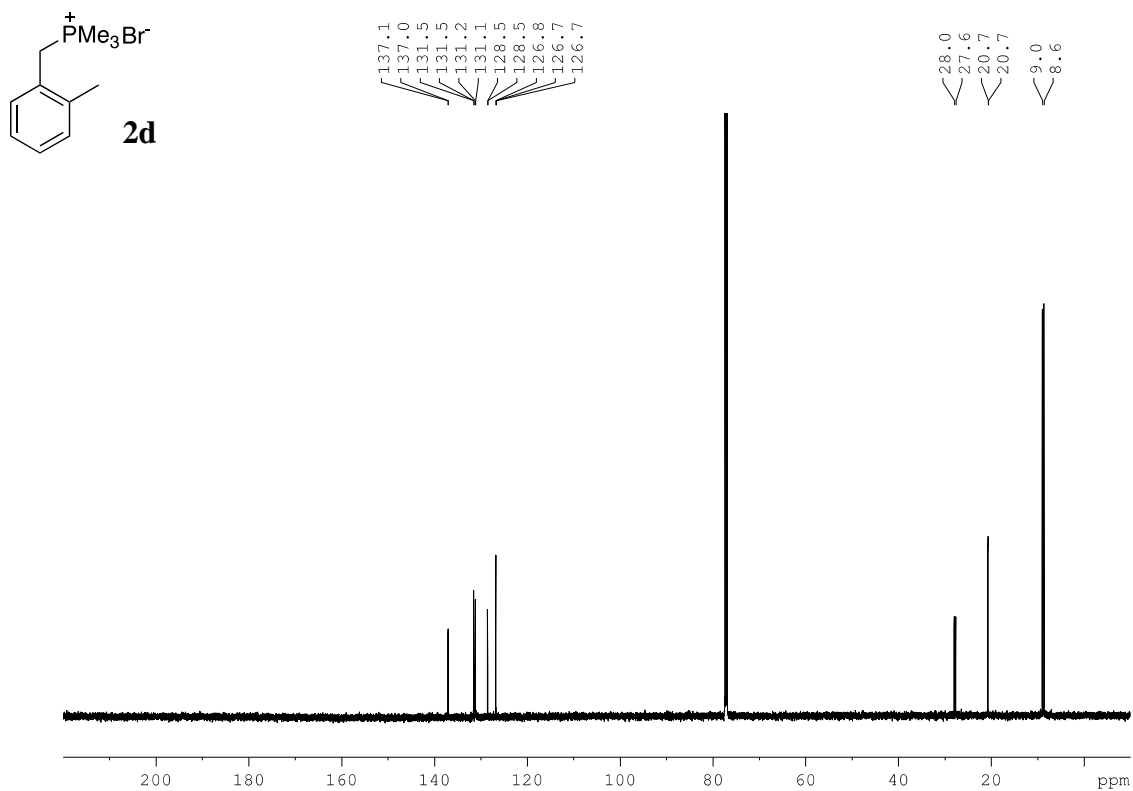



### $^1\text{H}$ NMR (600 MHz, $\text{CDCl}_3$ )

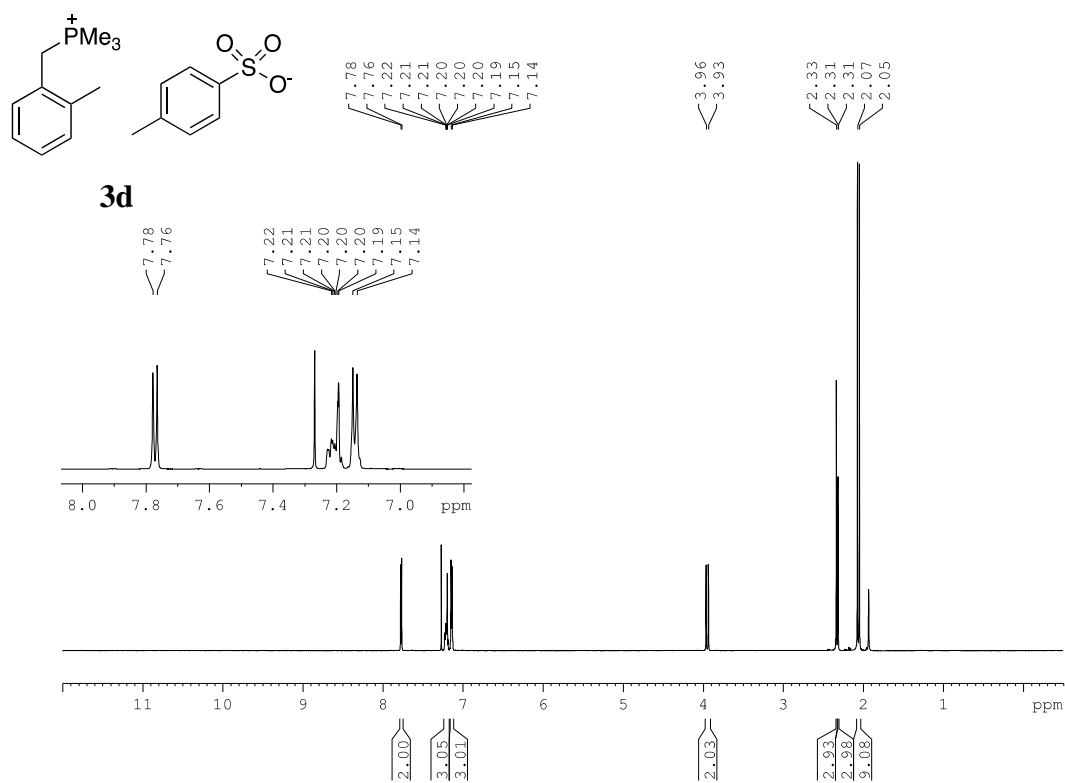

### $^{13}\text{C}$ NMR (151 MHz, $\text{CDCl}_3$ )

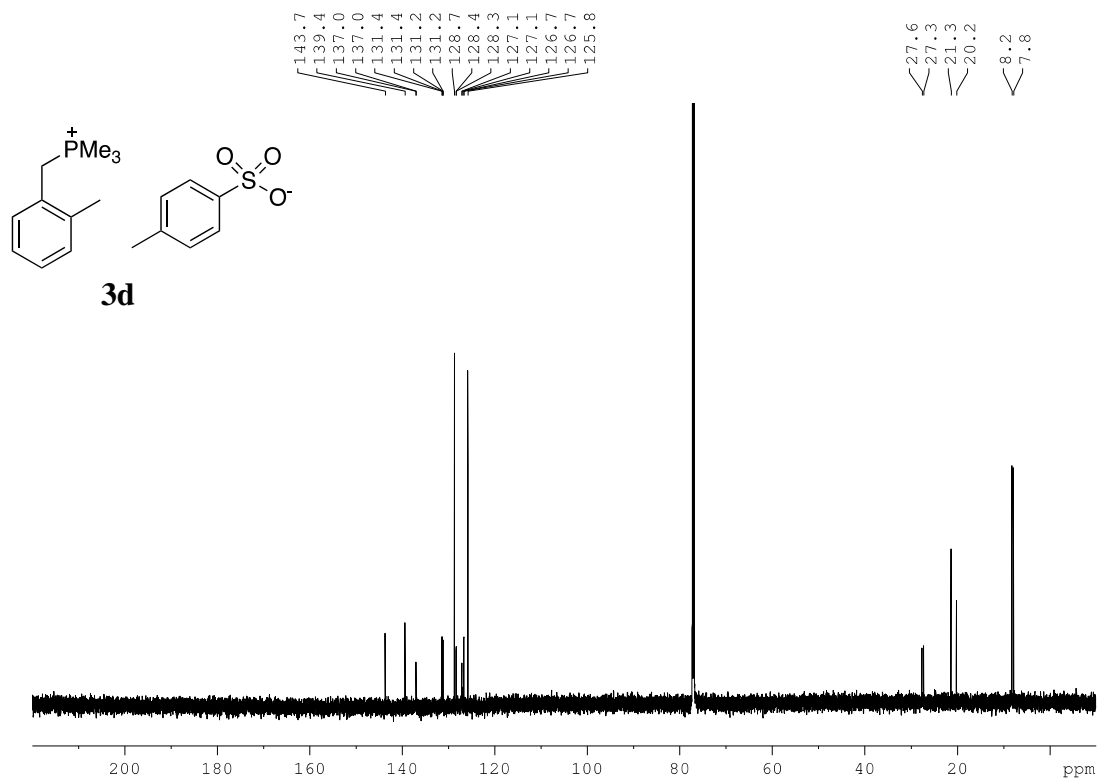

### $^1\text{H}$ NMR (400 MHz, $\text{DMSO-d}_6$ )

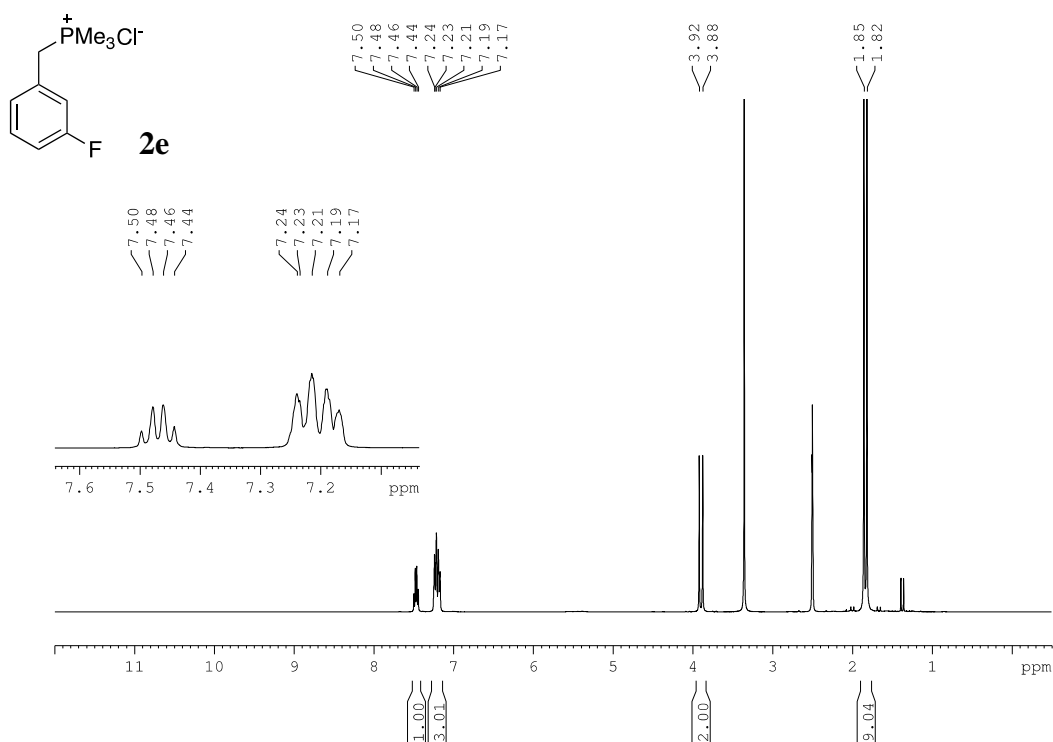

### $^{13}\text{C}$ NMR (101 MHz, $\text{DMSO-d}_6$ )

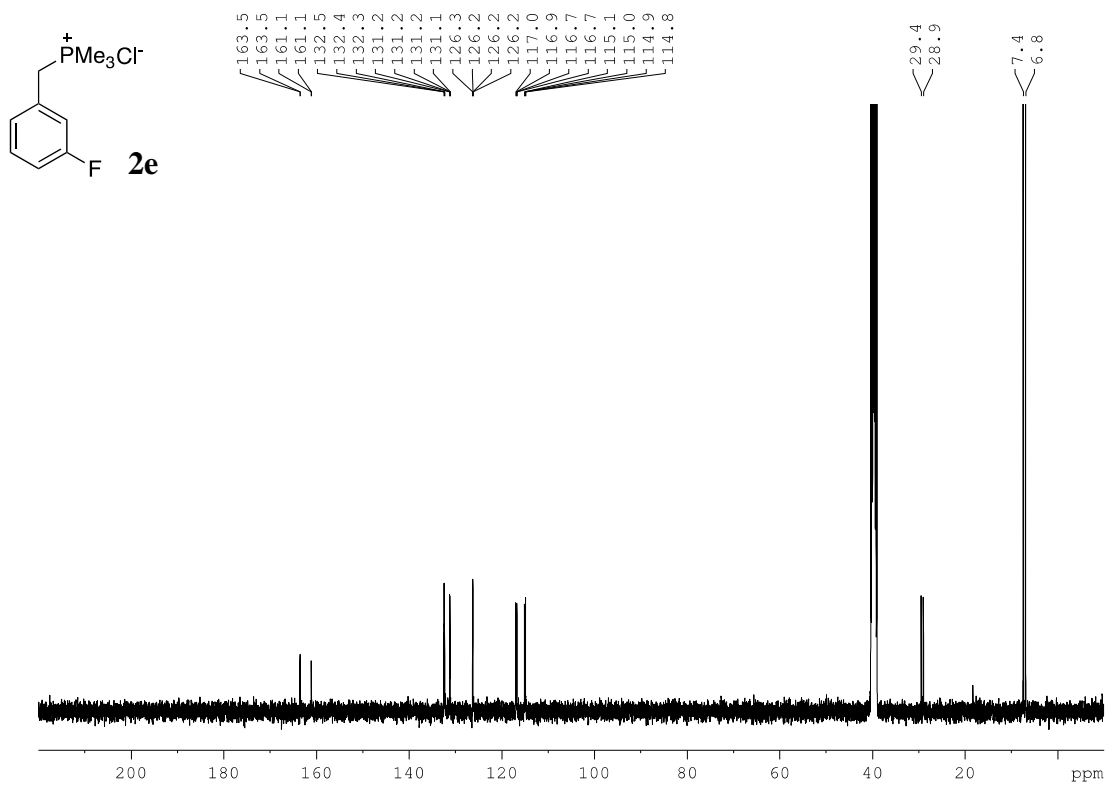

### $^1\text{H}$ NMR (400 MHz, $\text{DMSO-d}_6$ )

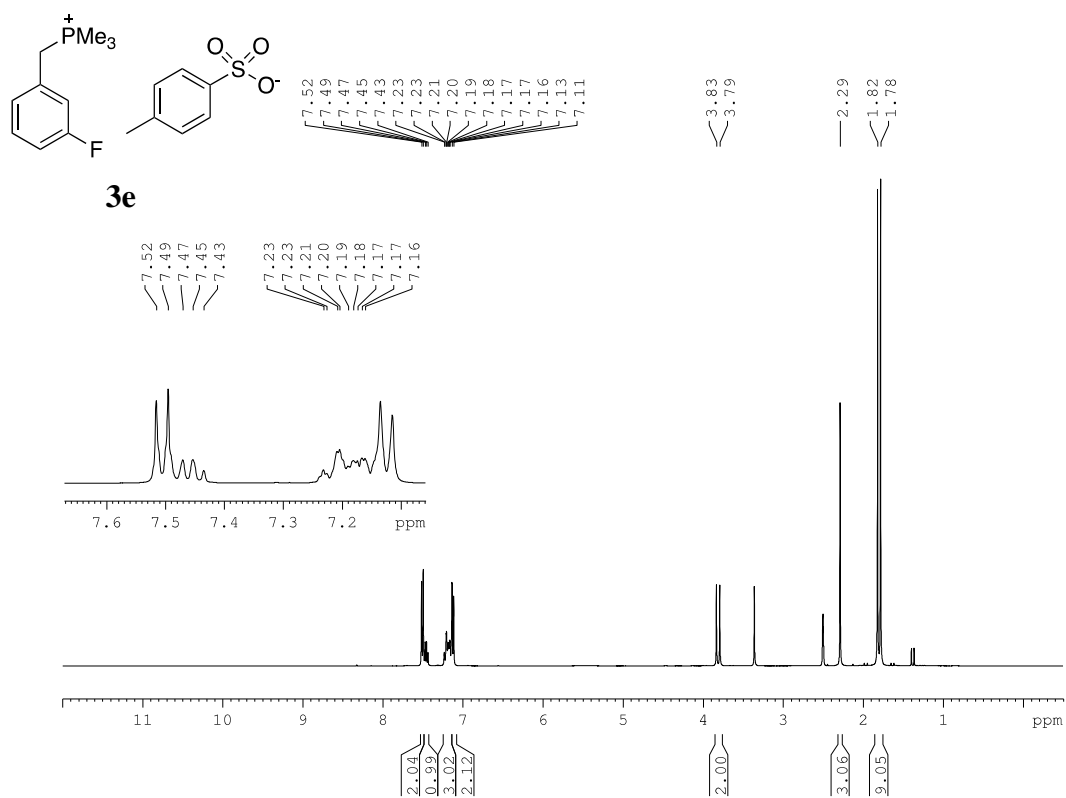

### $^{13}\text{C}$ NMR (101 MHz, $\text{DMSO-d}_6$ )

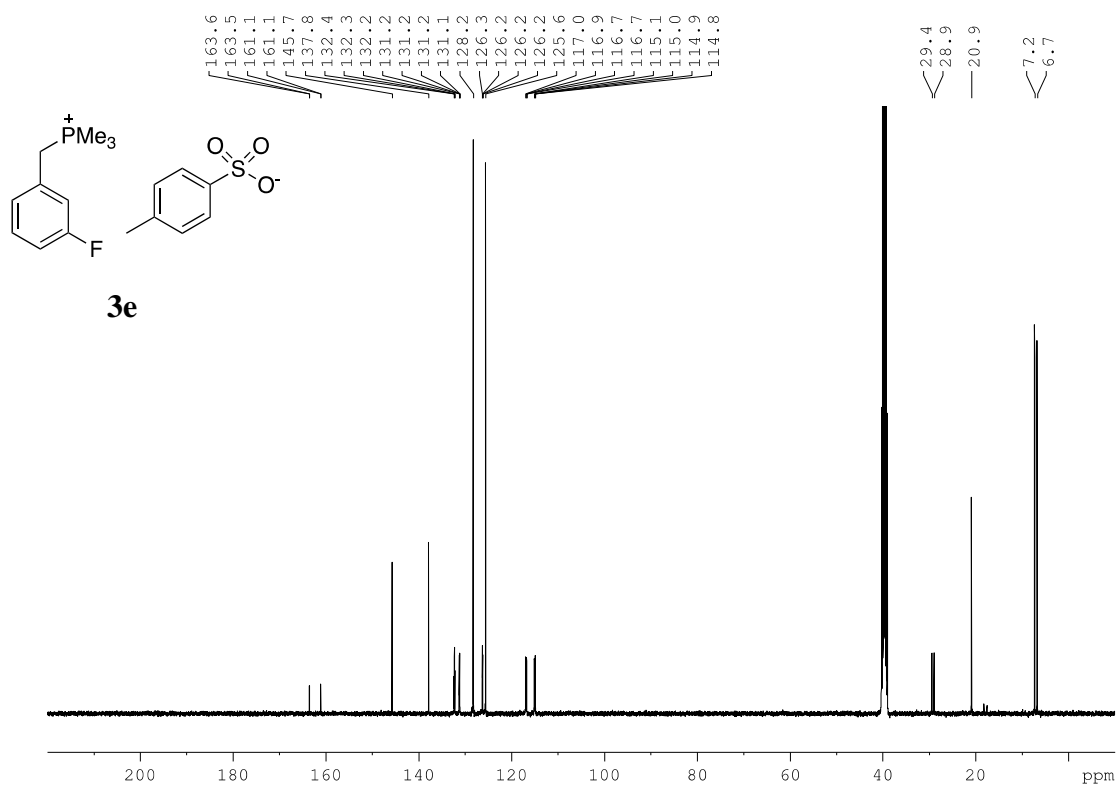

**$^1\text{H}$  NMR (600 MHz,  $\text{CDCl}_3$ )**

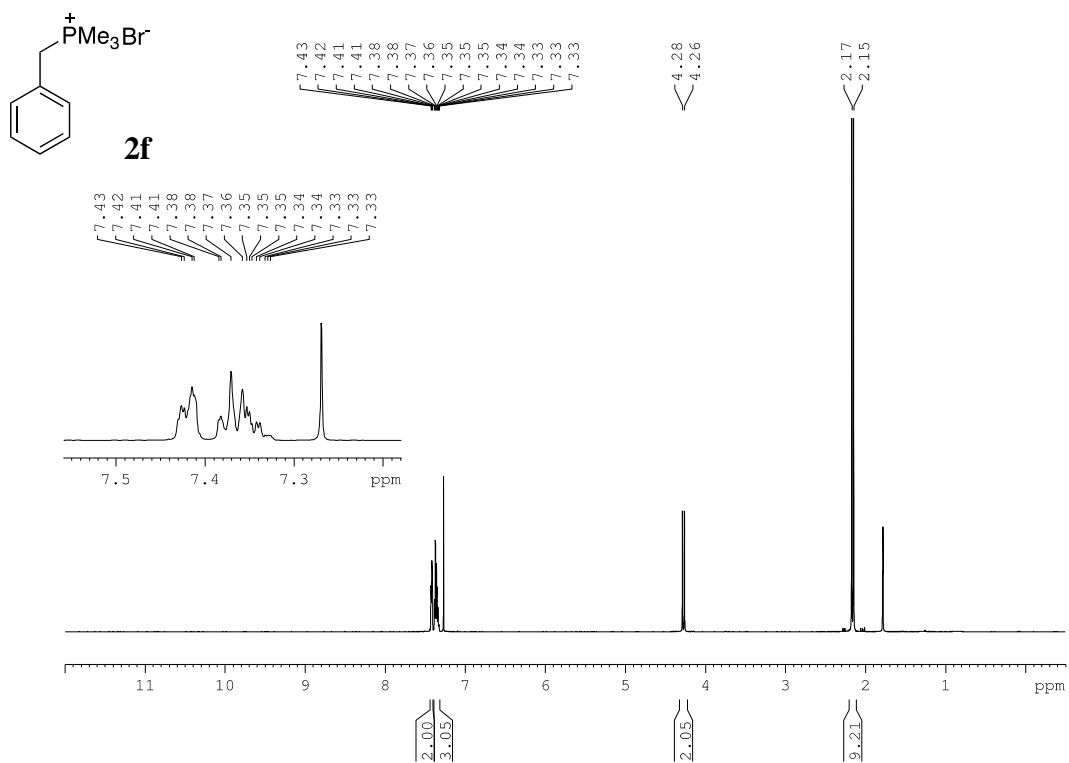

**$^{13}\text{C}$  NMR (151 MHz,  $\text{CDCl}_3$ )**

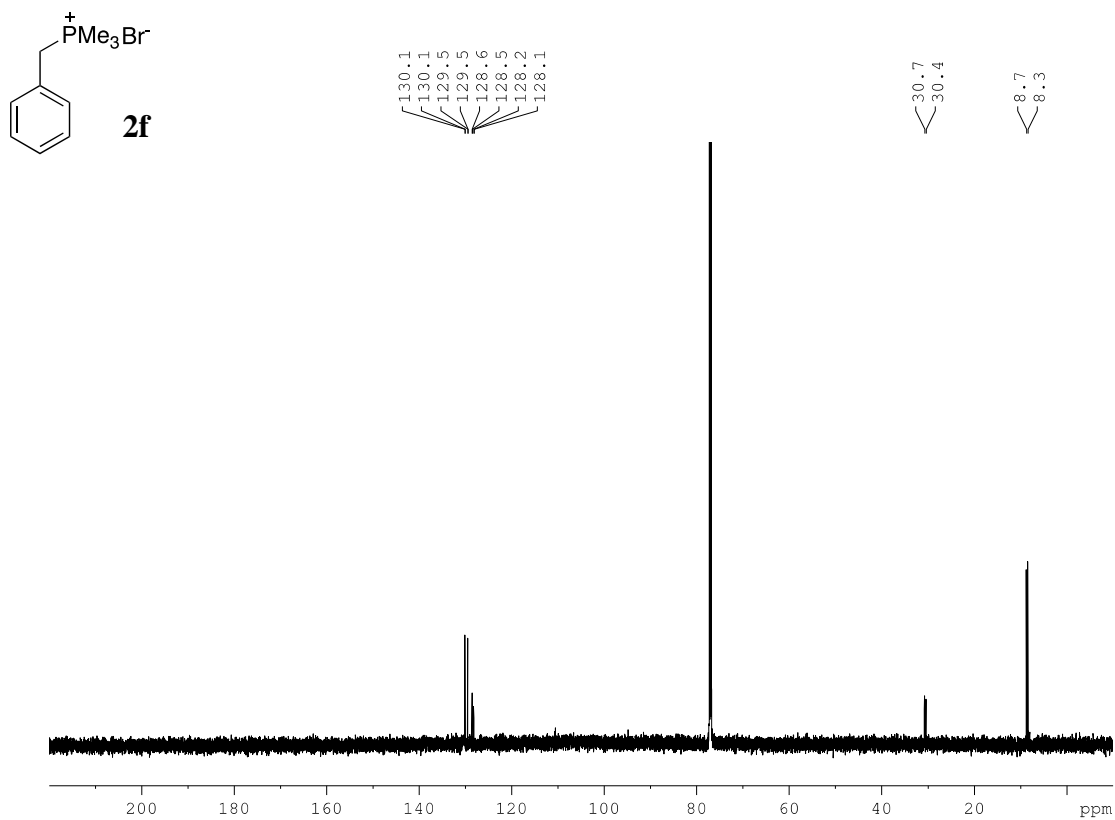

**<sup>1</sup>H NMR (600 MHz, CDCl<sub>3</sub>)**

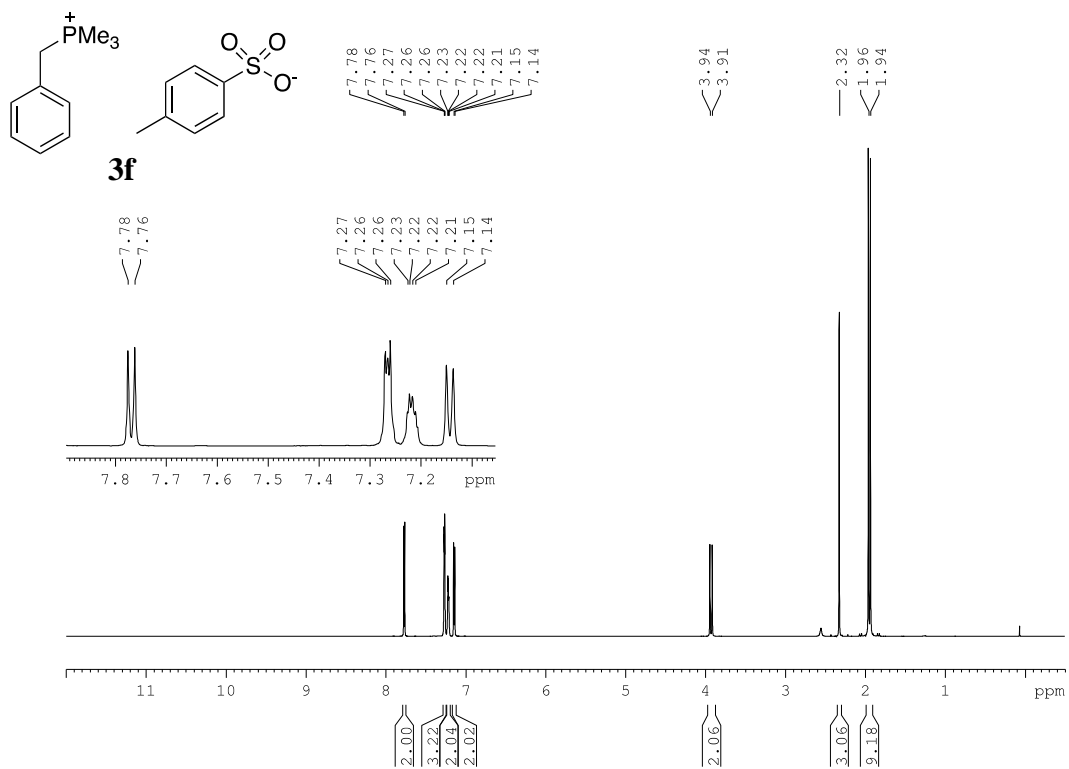

**<sup>13</sup>C NMR (151 MHz, CDCl<sub>3</sub>)**

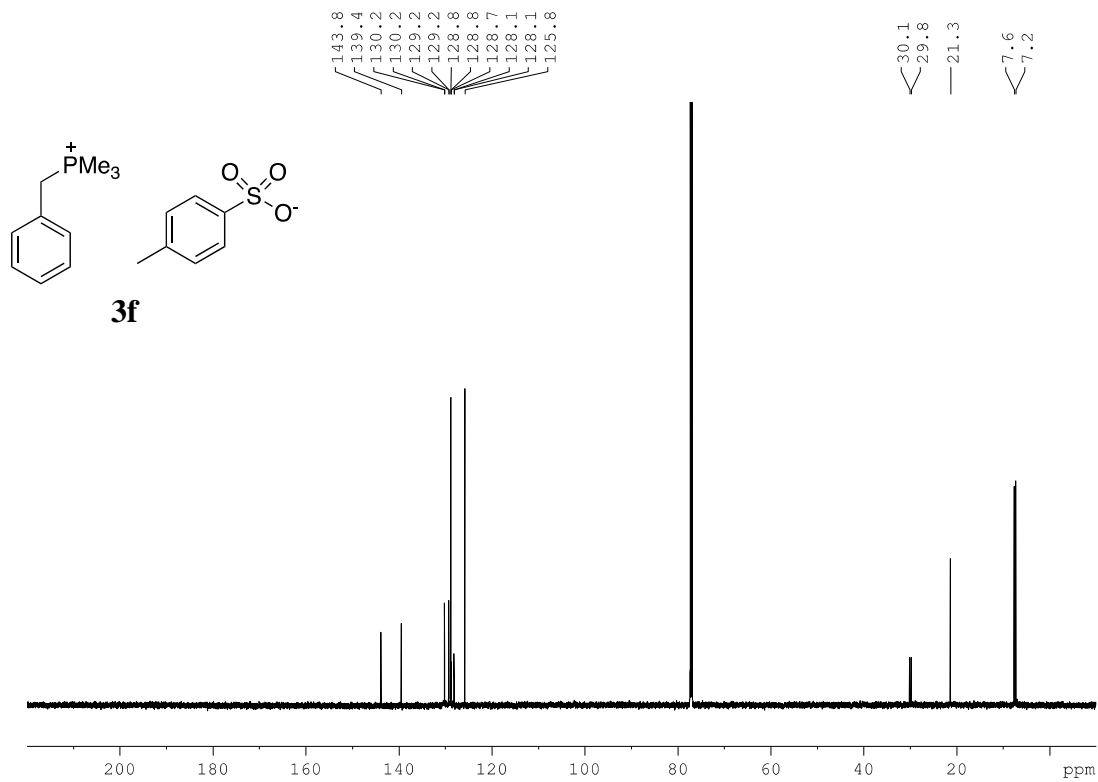

### $^1\text{H}$ NMR (600 MHz, $\text{CDCl}_3$ )

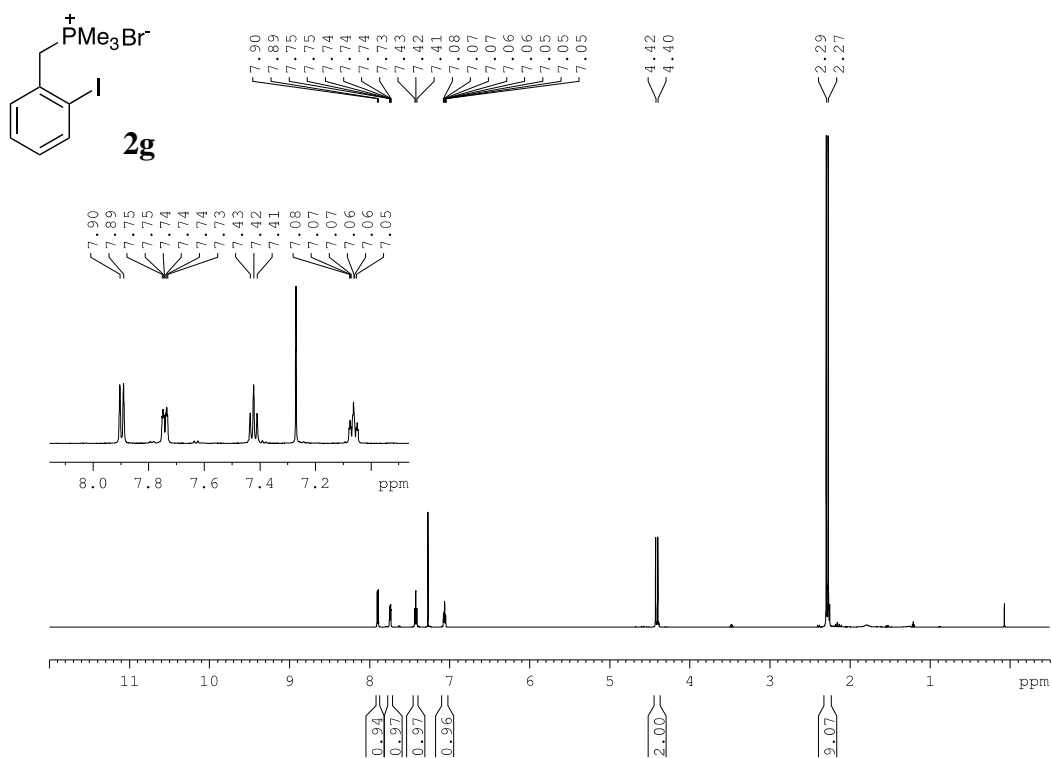

### $^{13}\text{C}$ NMR (101 MHz, $\text{CDCl}_3$ )

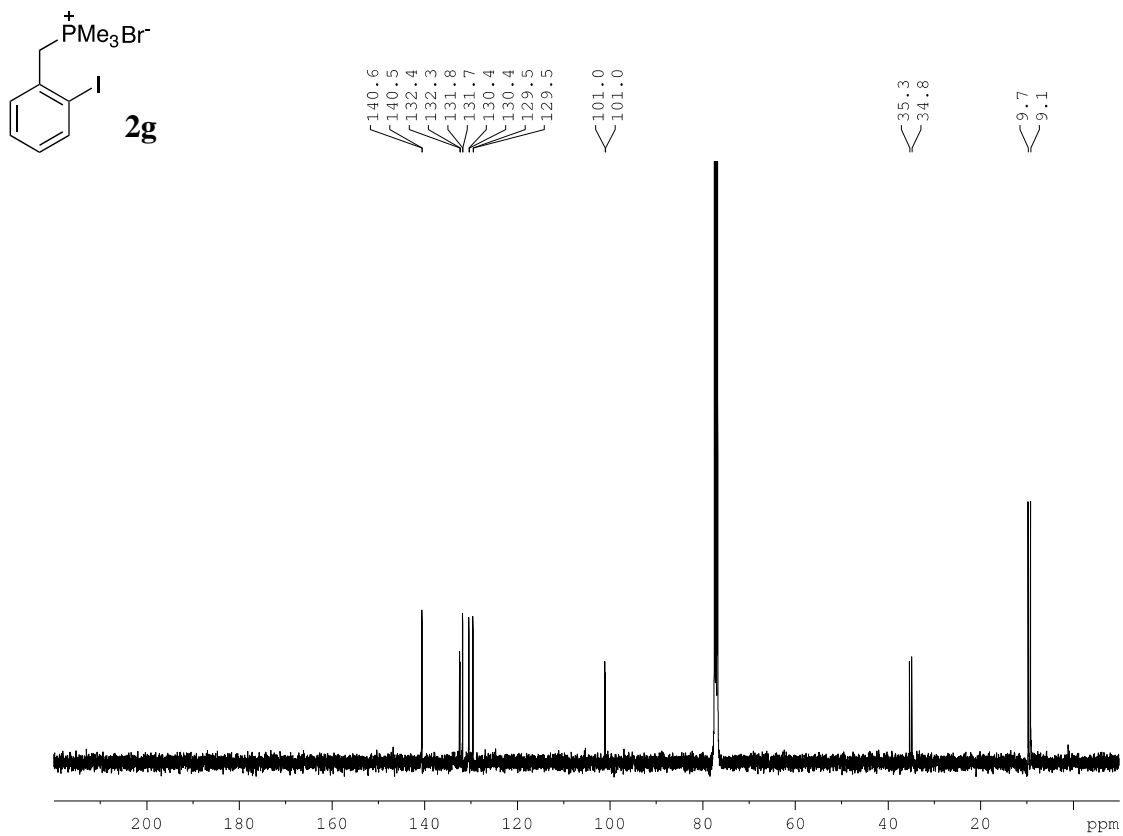

### $^1\text{H}$ NMR (600 MHz, $\text{CDCl}_3$ )

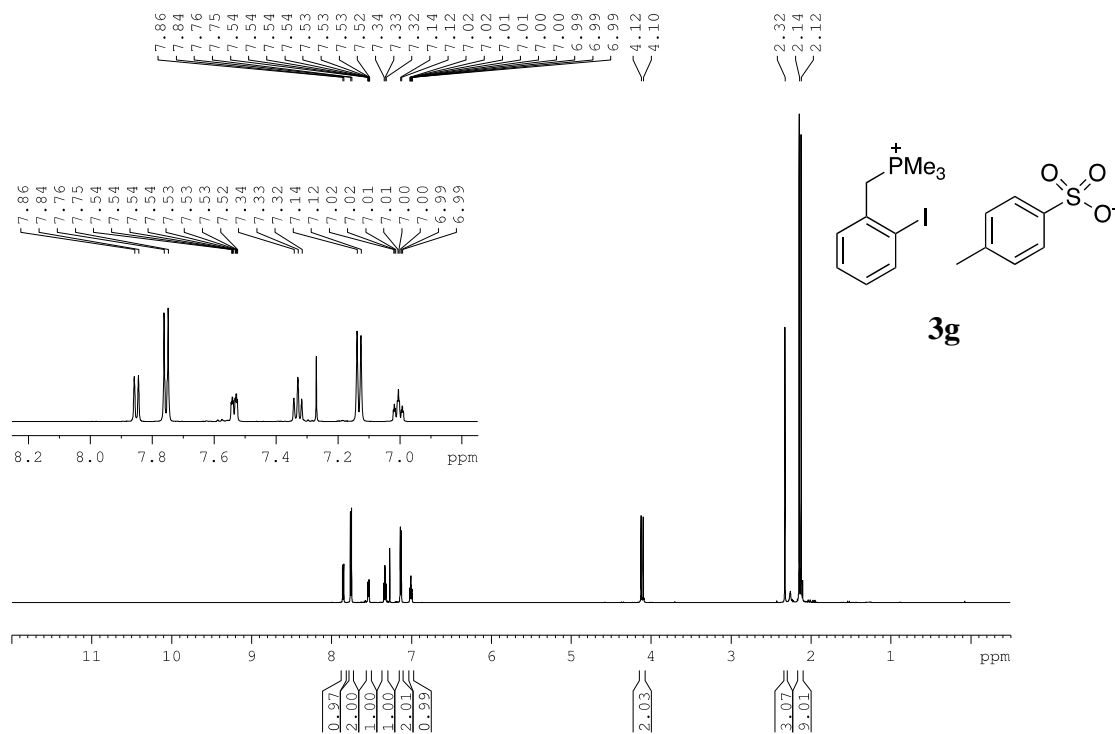

### $^{13}\text{C}$ NMR (151 MHz, $\text{CDCl}_3$ )

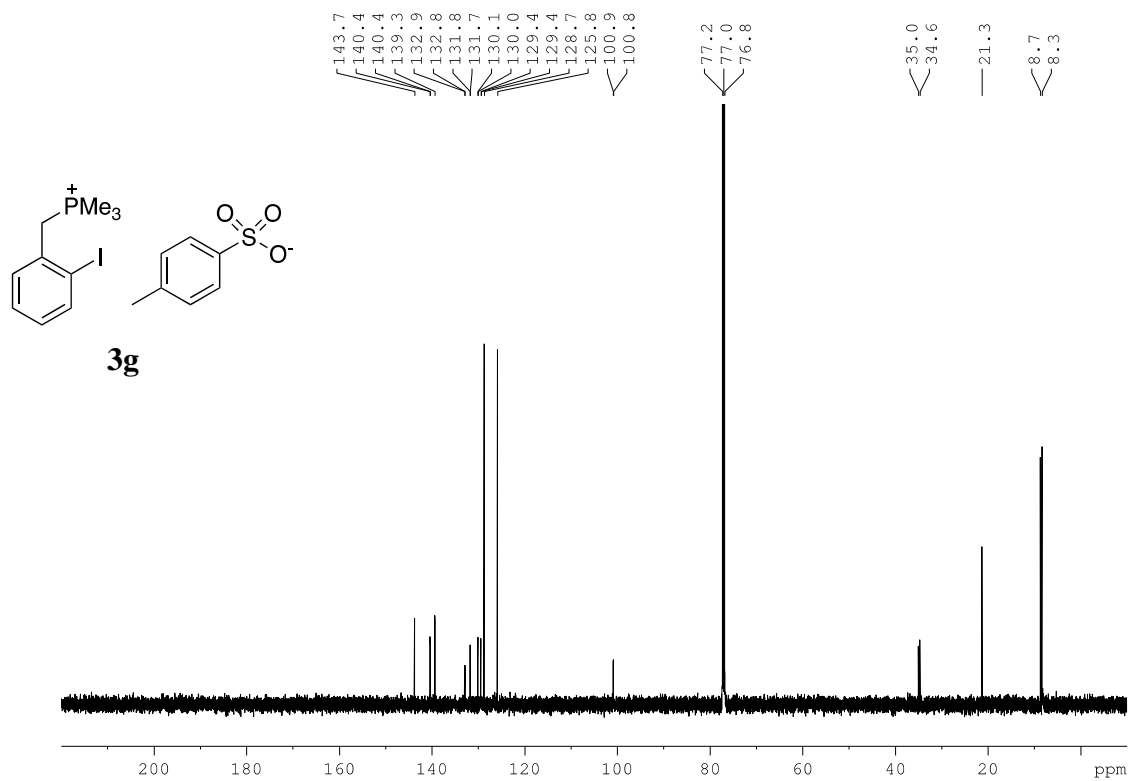

# $^1\text{H}$ NMR (600 MHz, $\text{CD}_3\text{OD}$ )

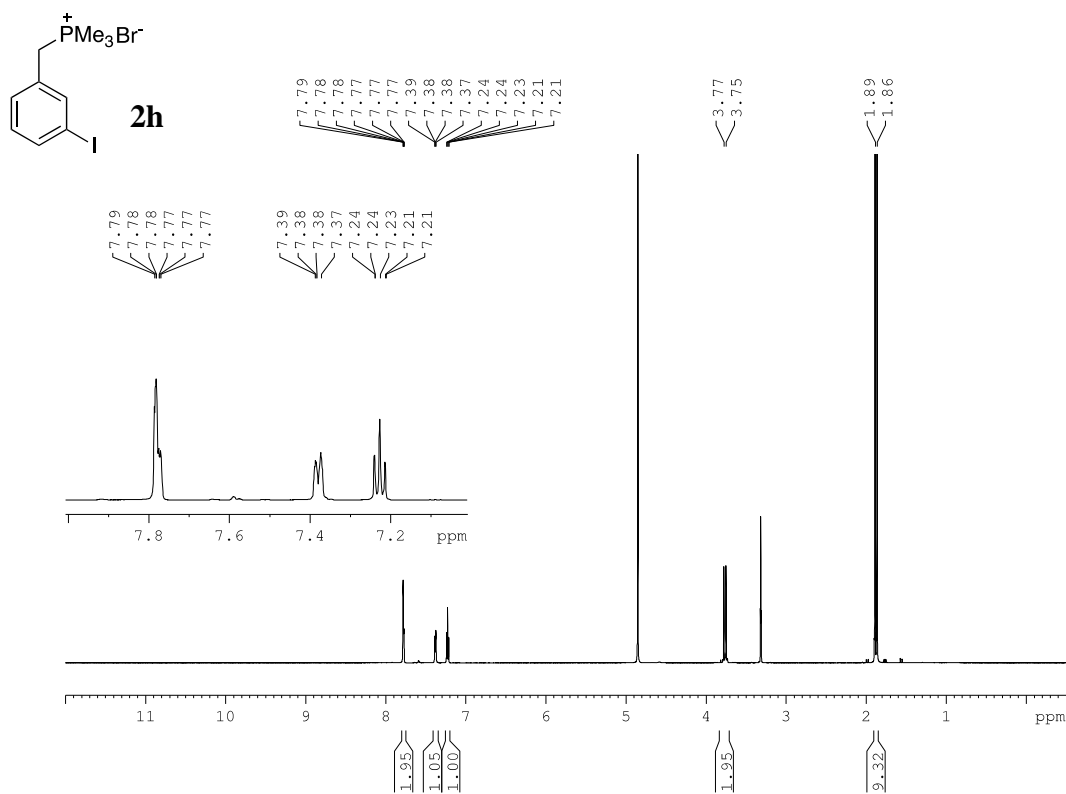

# $^{13}\text{C}$ NMR (151 MHz, $\text{CD}_3\text{OD}$ )

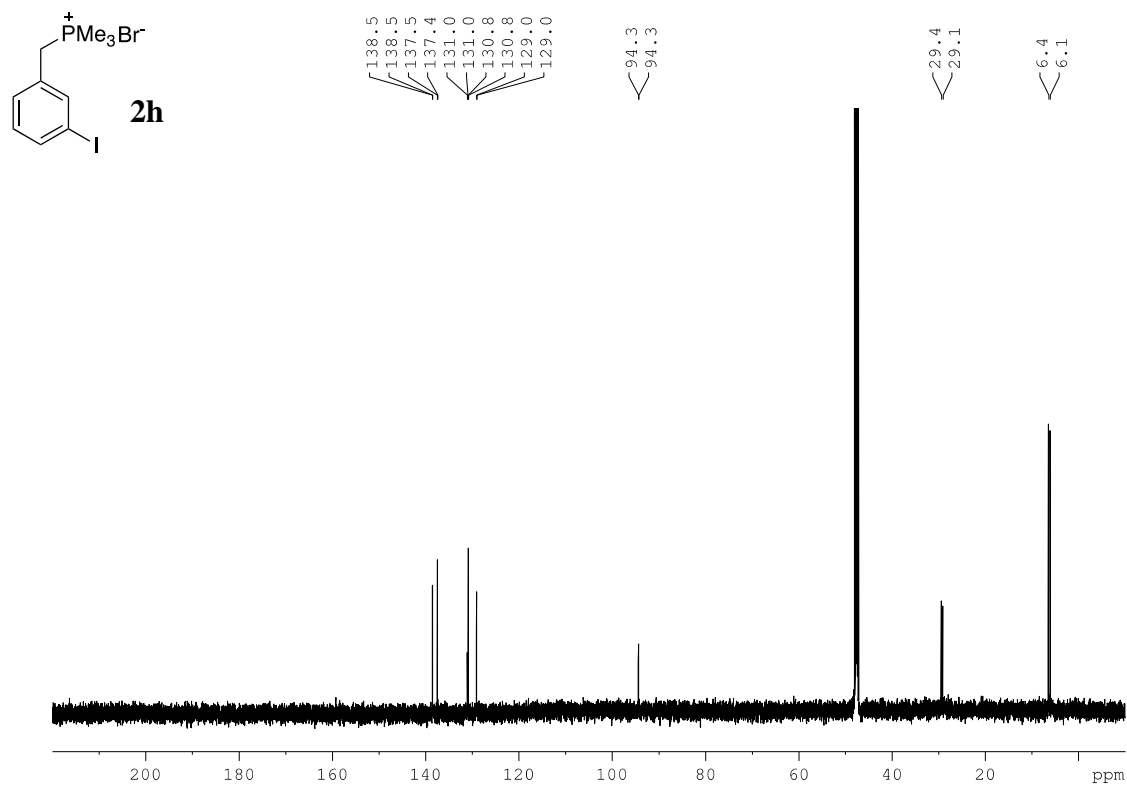



### $^1\text{H}$ NMR (400 MHz, $\text{DMSO-d}_6$ )

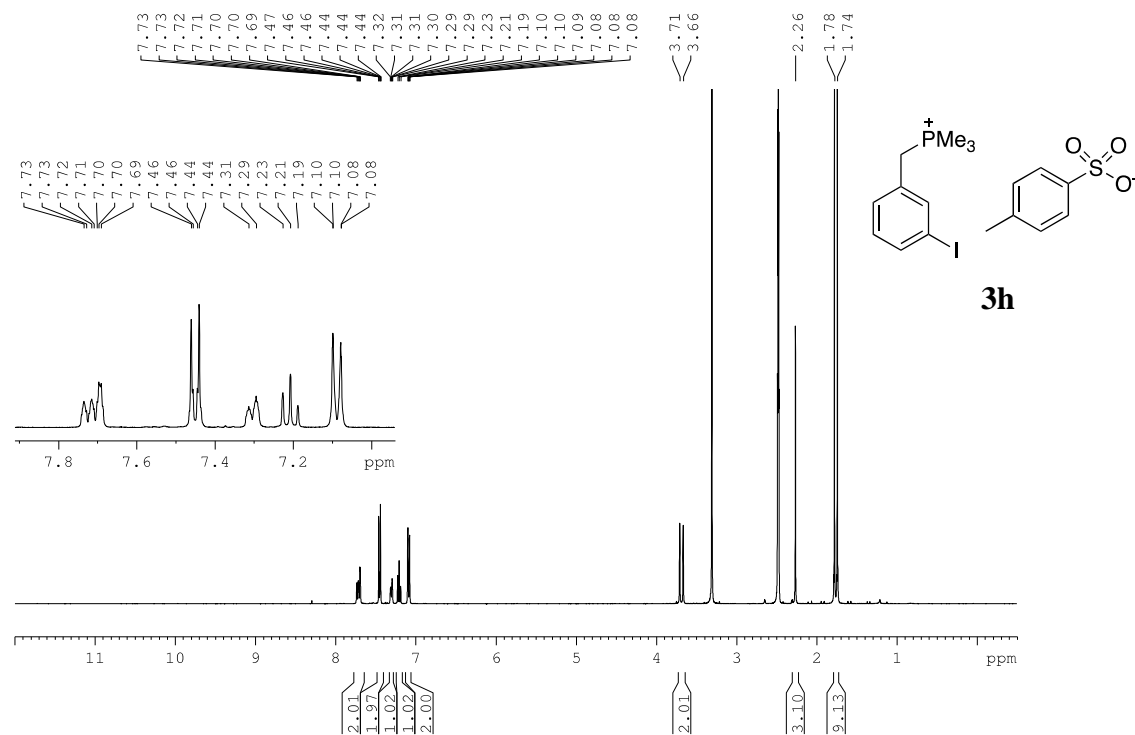

### $^{13}\text{C}$ NMR (101 MHz, $\text{DMSO-d}_6$ )

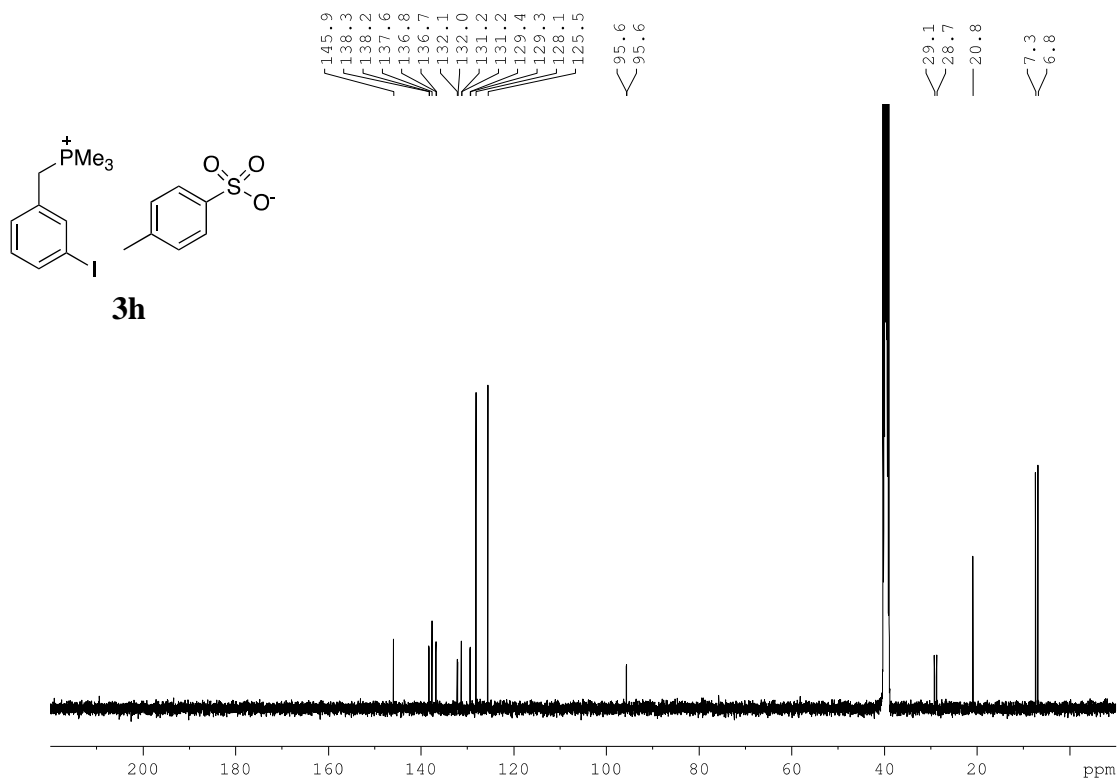

# $^1\text{H}$ NMR (600 MHz, $\text{CDCl}_3$ )

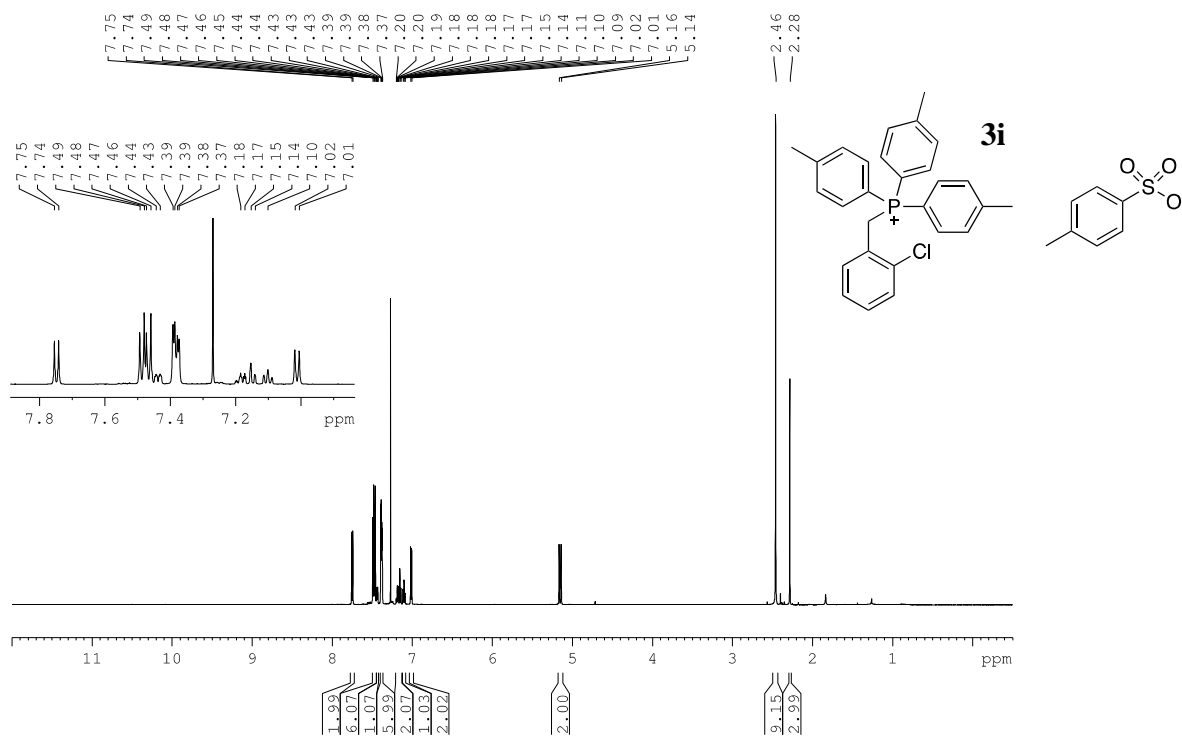

# $^{13}\text{C}$ NMR (151 MHz, $\text{CDCl}_3$ )

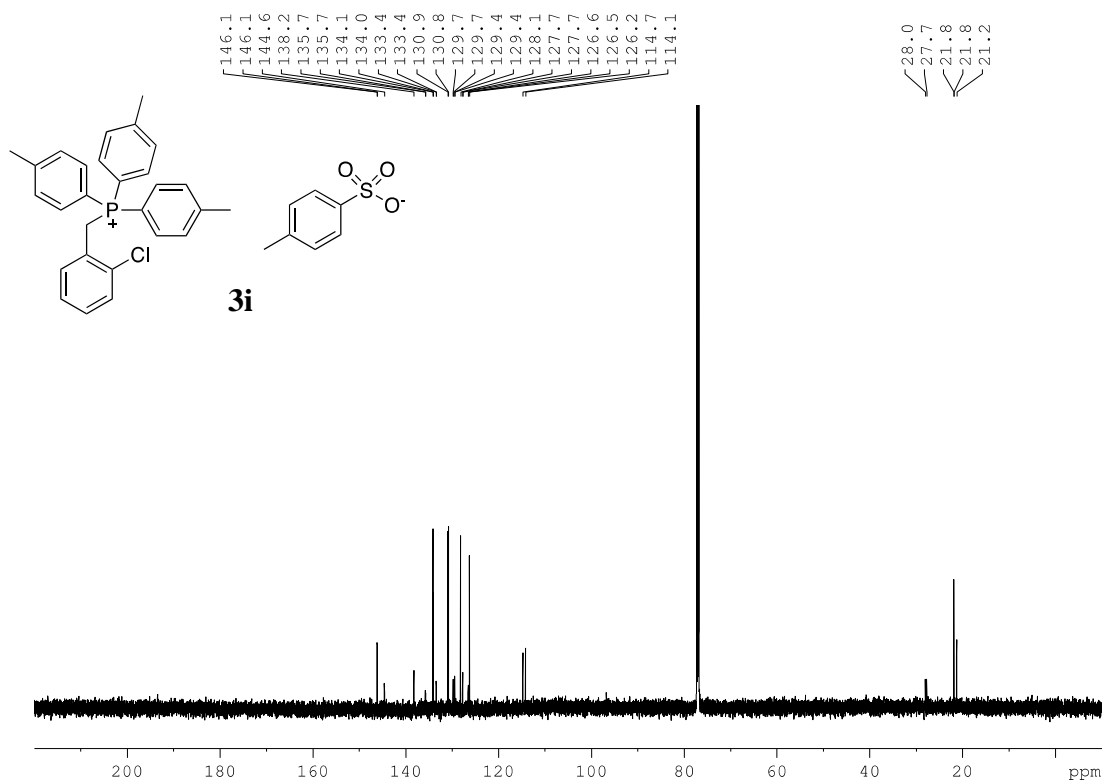

### <sup>1</sup>H NMR (600 MHz, CDCl<sub>3</sub>)

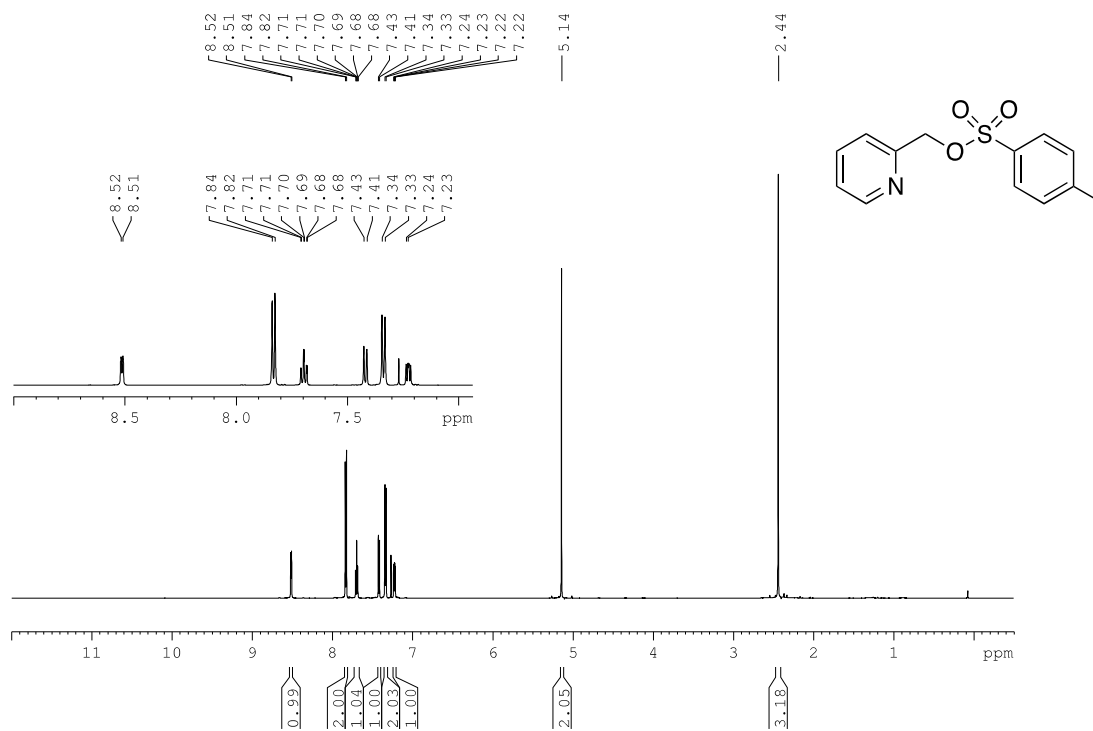

### <sup>13</sup>C NMR (151 MHz, CDCl<sub>3</sub>)

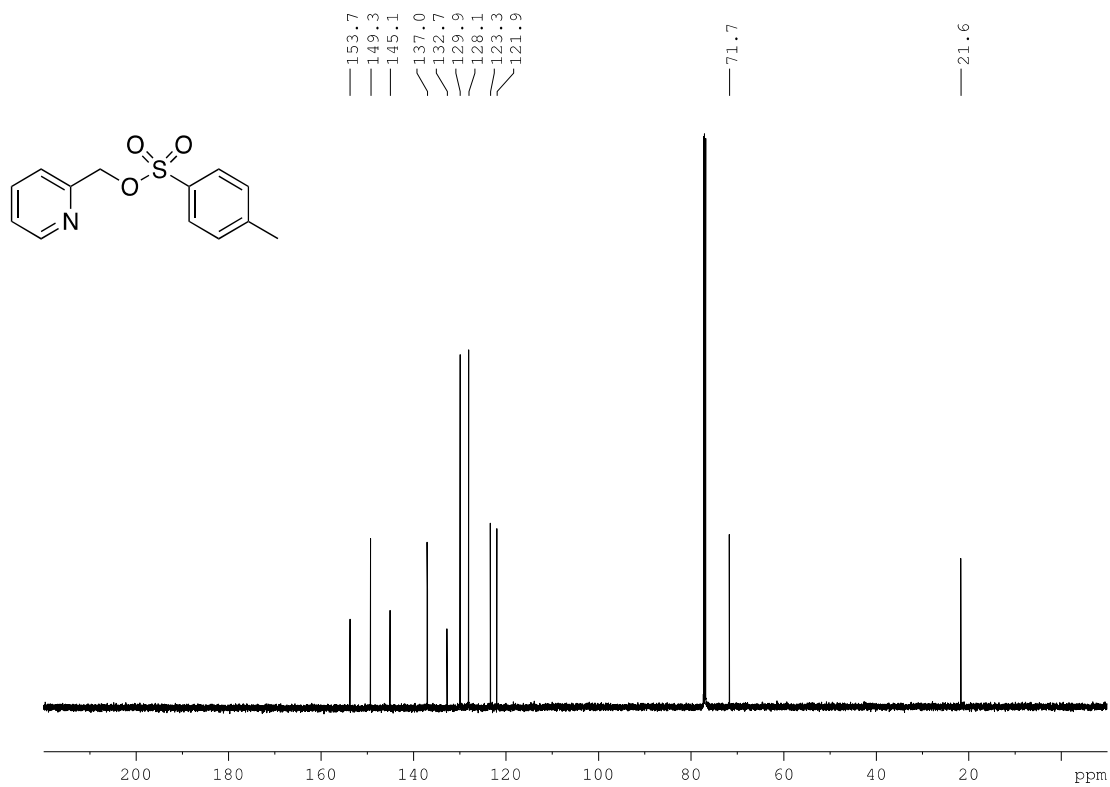



## 1.2 NMR data for borylation products

Borylation of 3a w/ 1:  $^1\text{H}$  NMR (600 MHz,  $\text{CDCl}_3$ ), crude NMR, 0.1 mmol

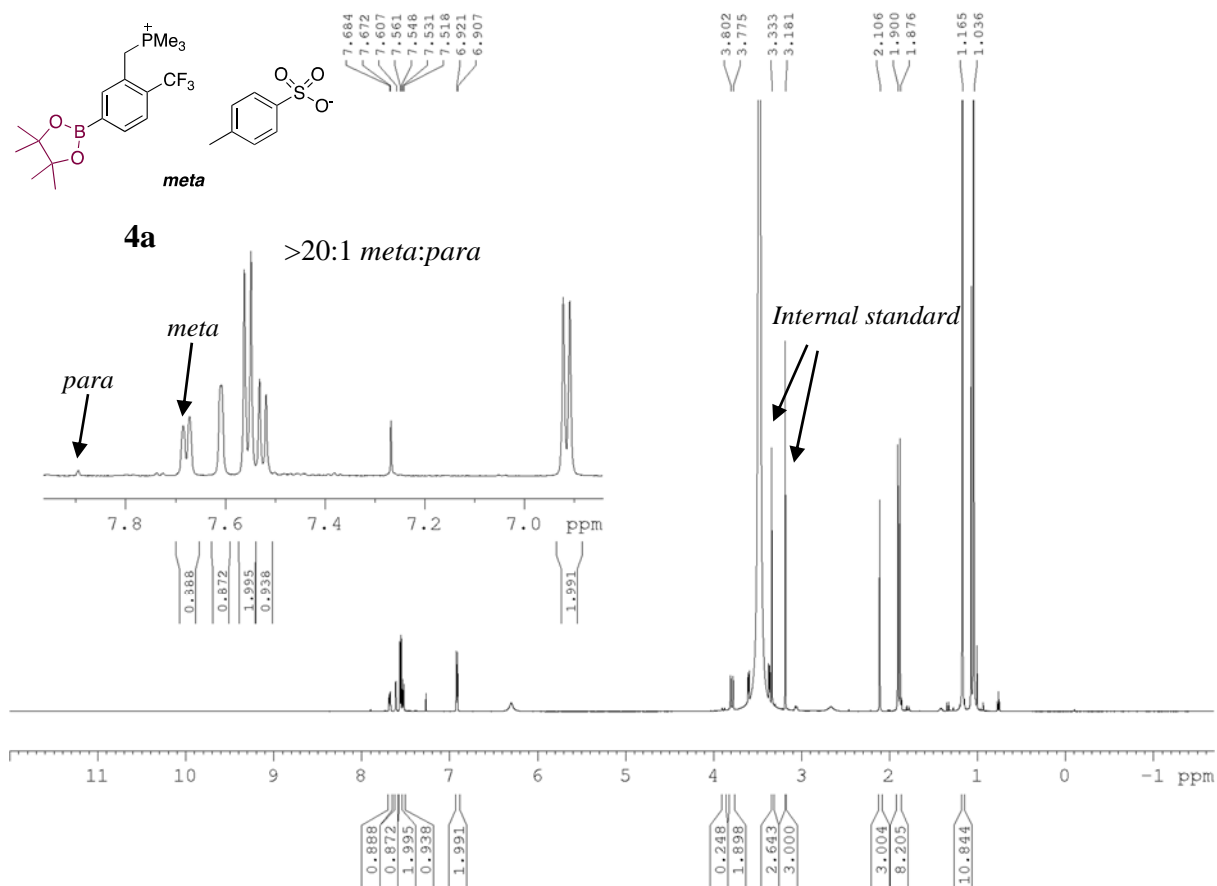

**Borylation of 3a w/ 1:  $^1\text{H}$  NMR (400 MHz,  $\text{CDCl}_3$ ), crude NMR, 0.25 mmol**

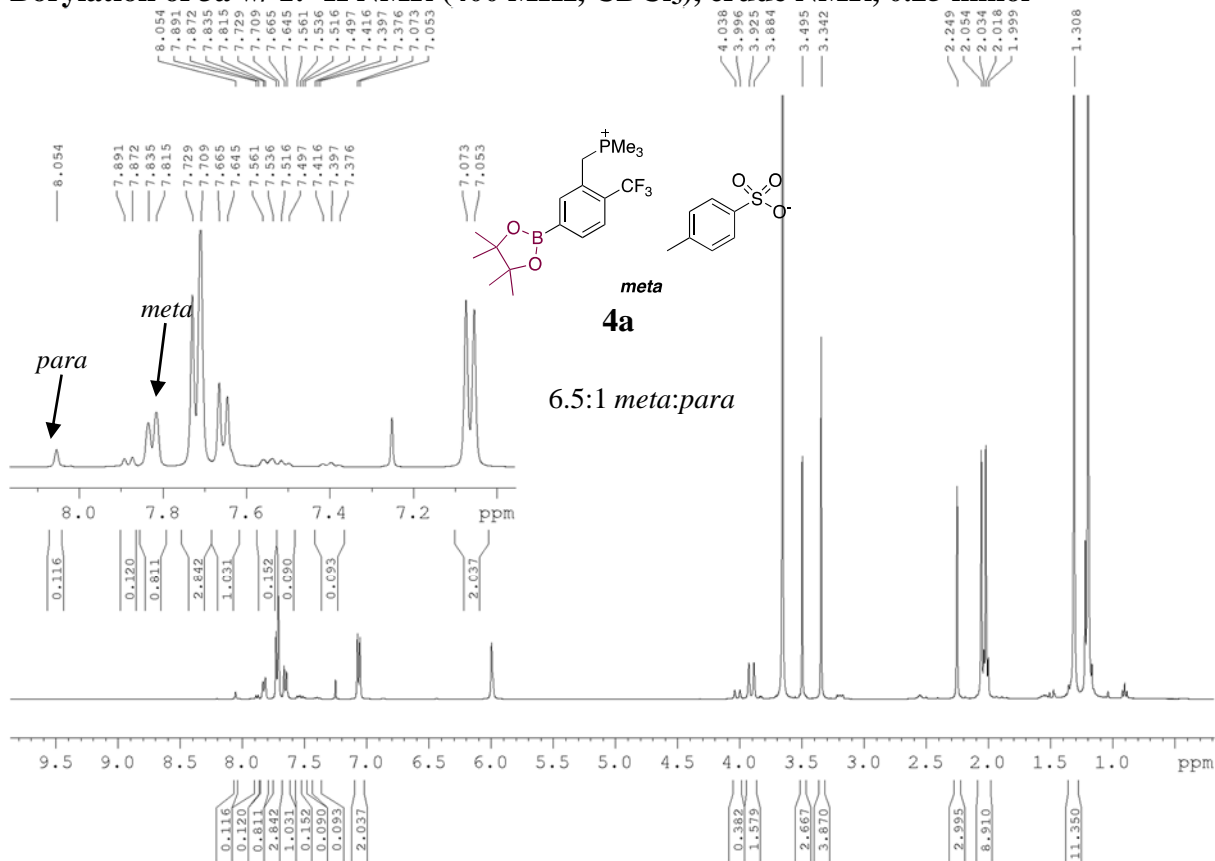

**Borylation of 3a w/ 1:  $^{13}\text{C}$  NMR (101 MHz,  $\text{CDCl}_3$ ), crude NMR, 0.25 mmol**

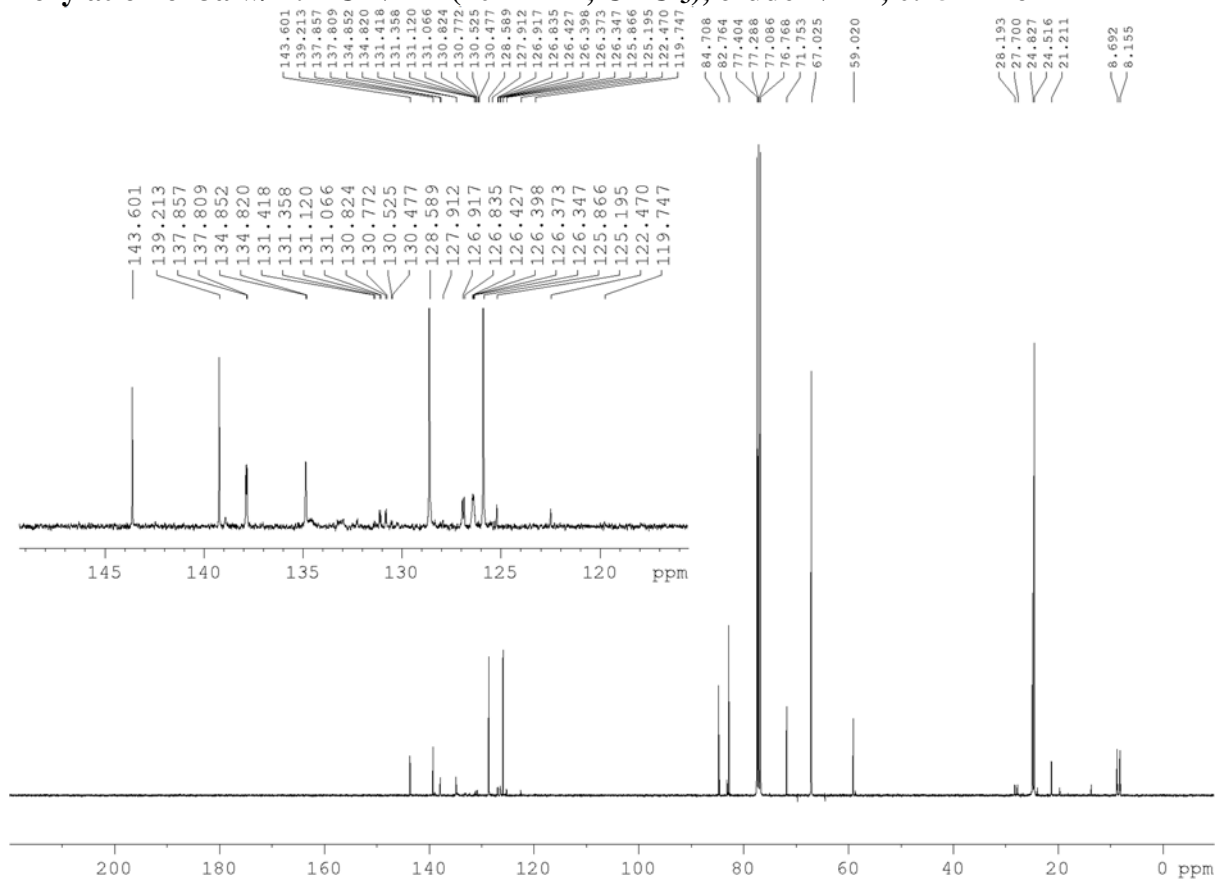

**Borylation of 3a w/ tmphen:  $^1\text{H}$  NMR (400 MHz,  $\text{CDCl}_3$ ), crude NMR, 0.25 mmol**

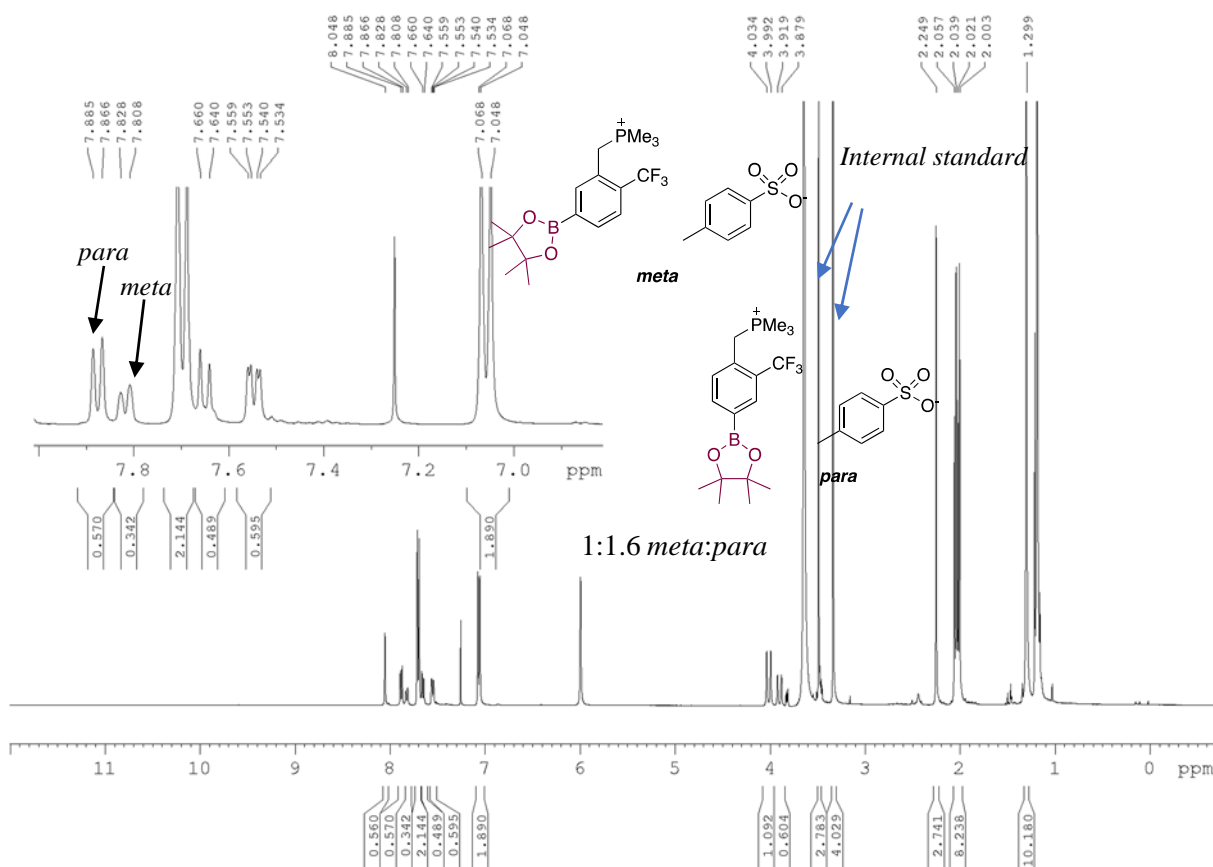

**Borylation of 3a w/ tmphen:  $^{13}\text{C}$  NMR (101 MHz,  $\text{CDCl}_3$ ), crude NMR, 0.25 mmol**

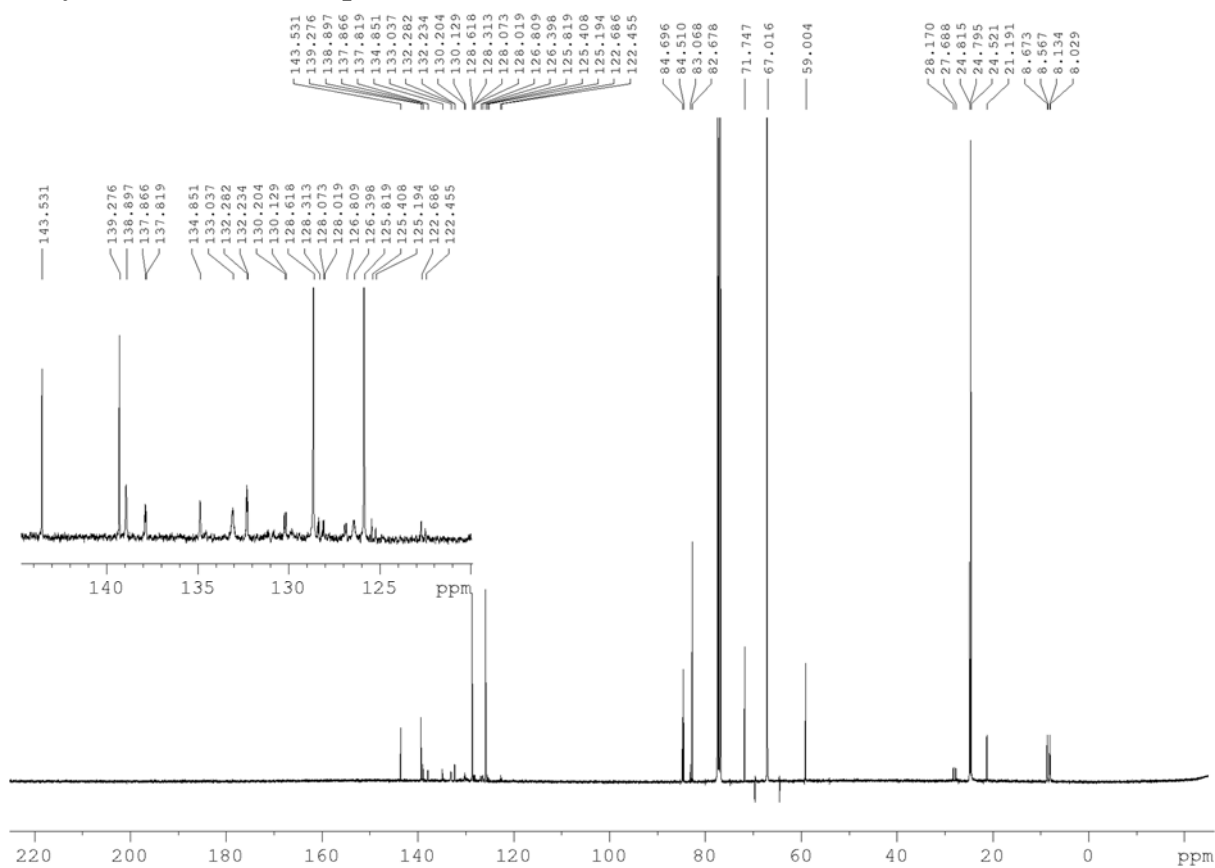

**Borylation of 3b w/ 1:  $^1\text{H}$  NMR (600 MHz,  $\text{CDCl}_3$ )**

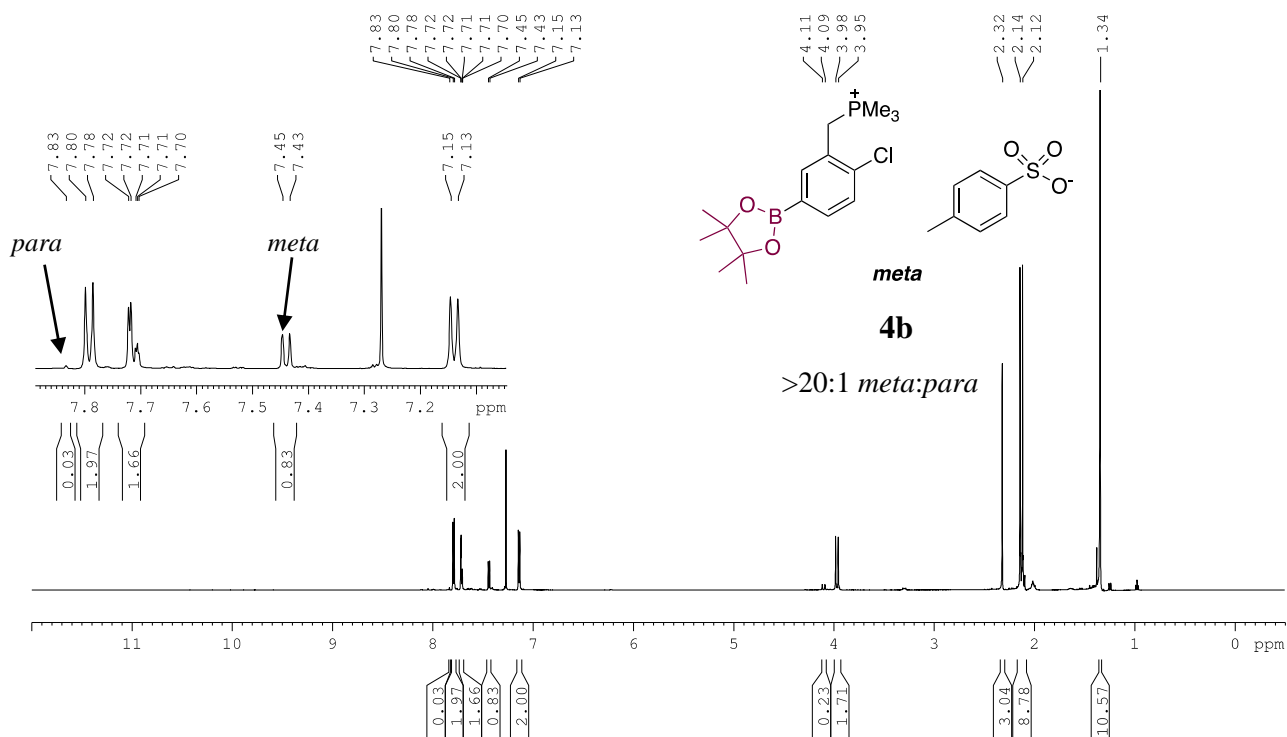

**Borylation of 3b w/ 1:  $^{13}\text{C}$  NMR (101 MHz,  $\text{CDCl}_3$ )**

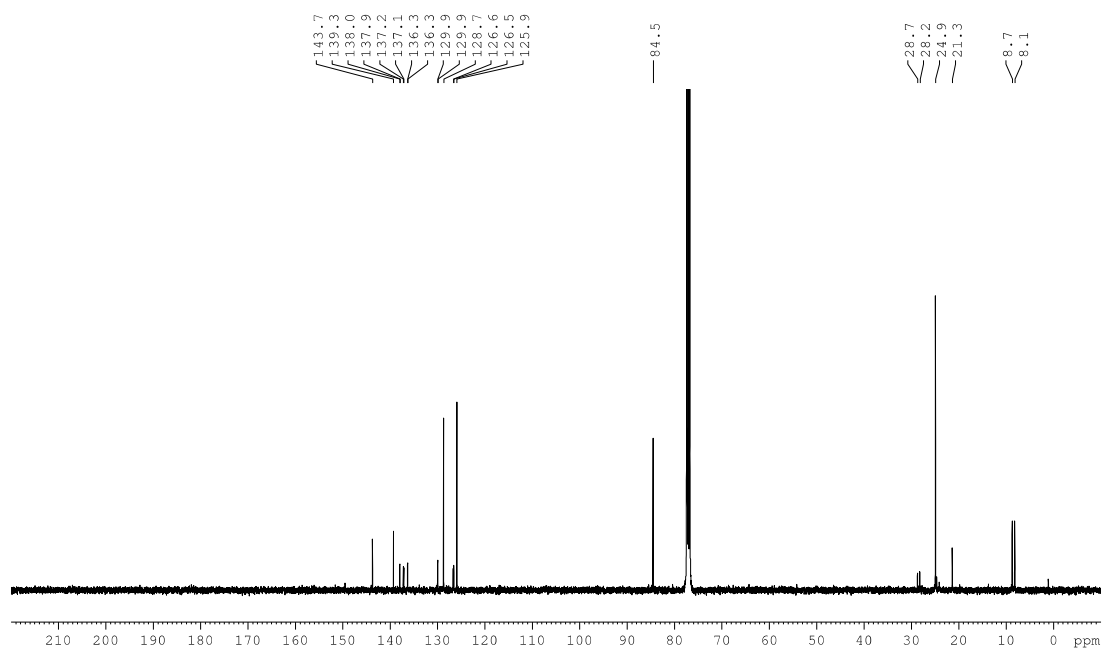





### Borylation of 3c w/ 1: <sup>1</sup>H NMR (600 MHz, CDCl<sub>3</sub>)

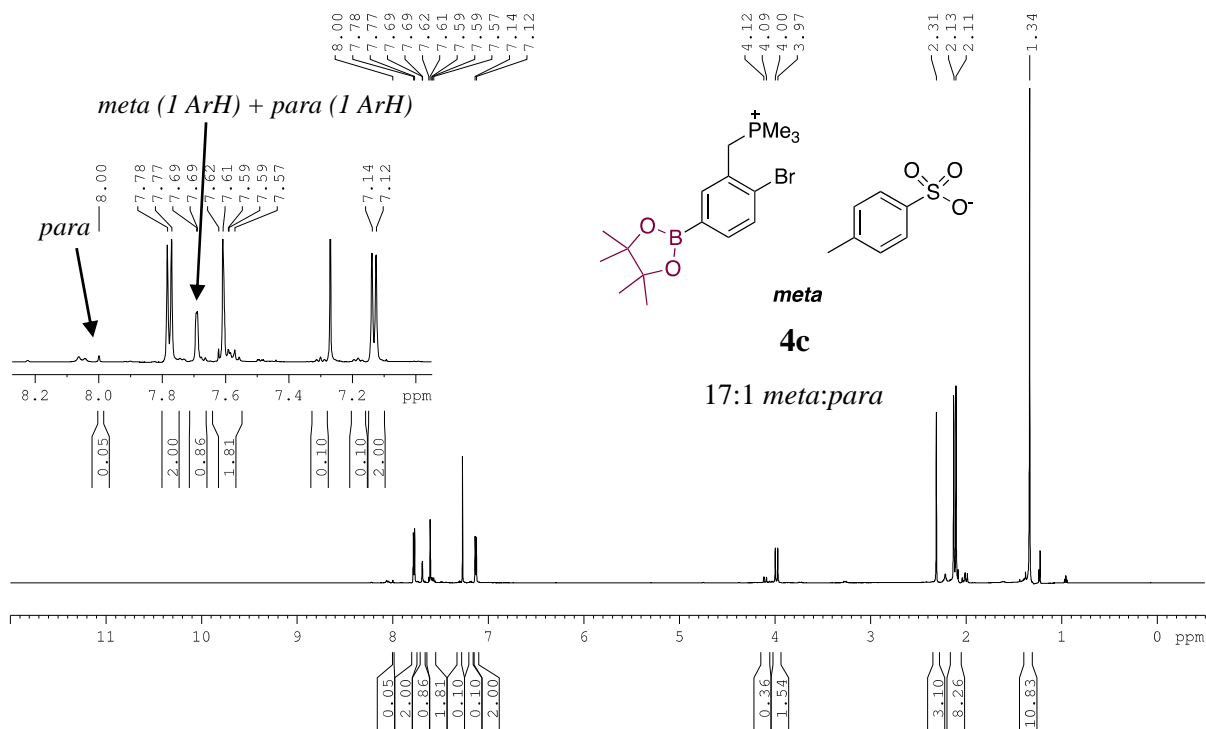

### Borylation of 3c w/ 1: <sup>13</sup>C NMR (101 MHz, CDCl<sub>3</sub>)

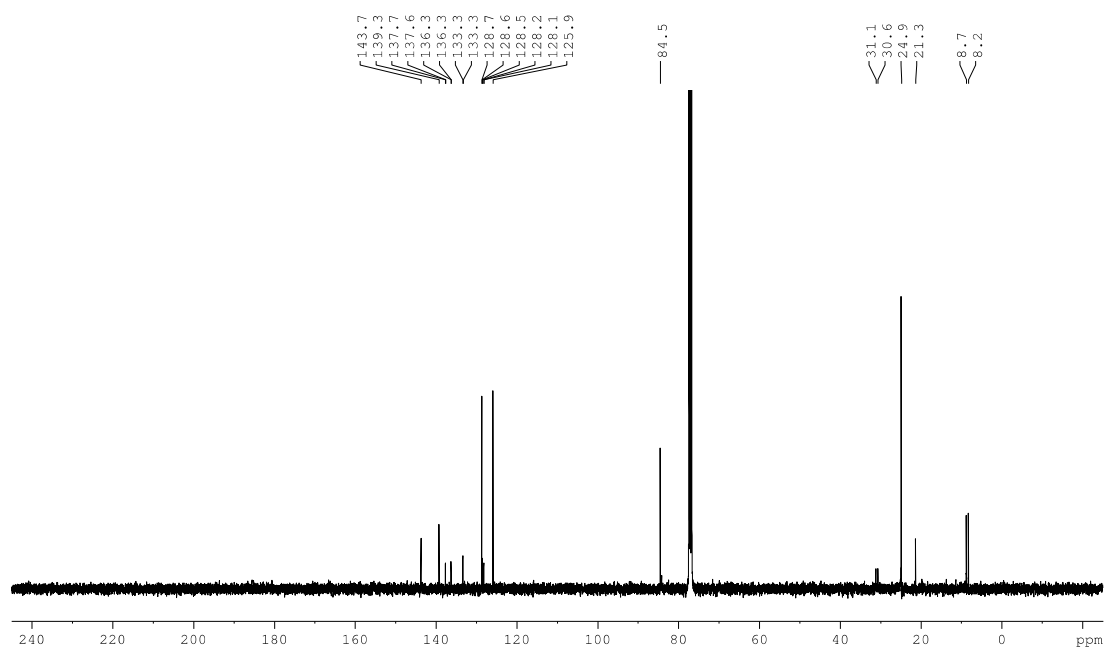

**Borylation of 3c w/ tmphen:  $^1\text{H}$  NMR (600 MHz,  $\text{CDCl}_3$ )**

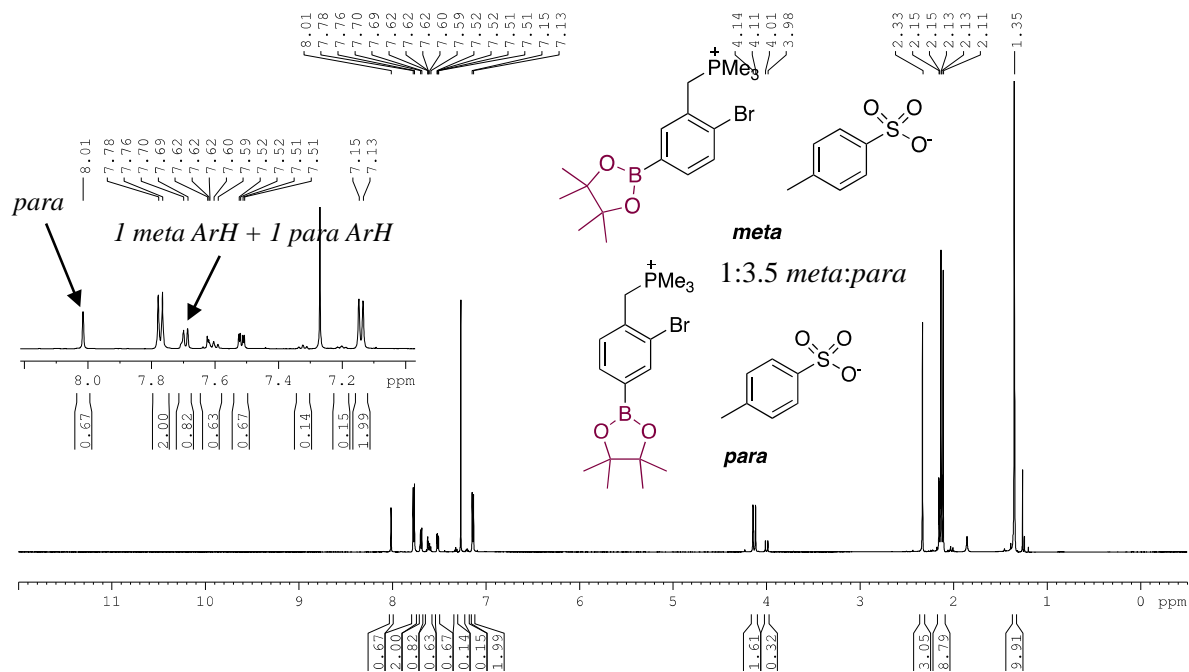

**Borylation of 3c w/ tmphen:  $^{13}\text{C}$  NMR (101 MHz,  $\text{CDCl}_3$ )**

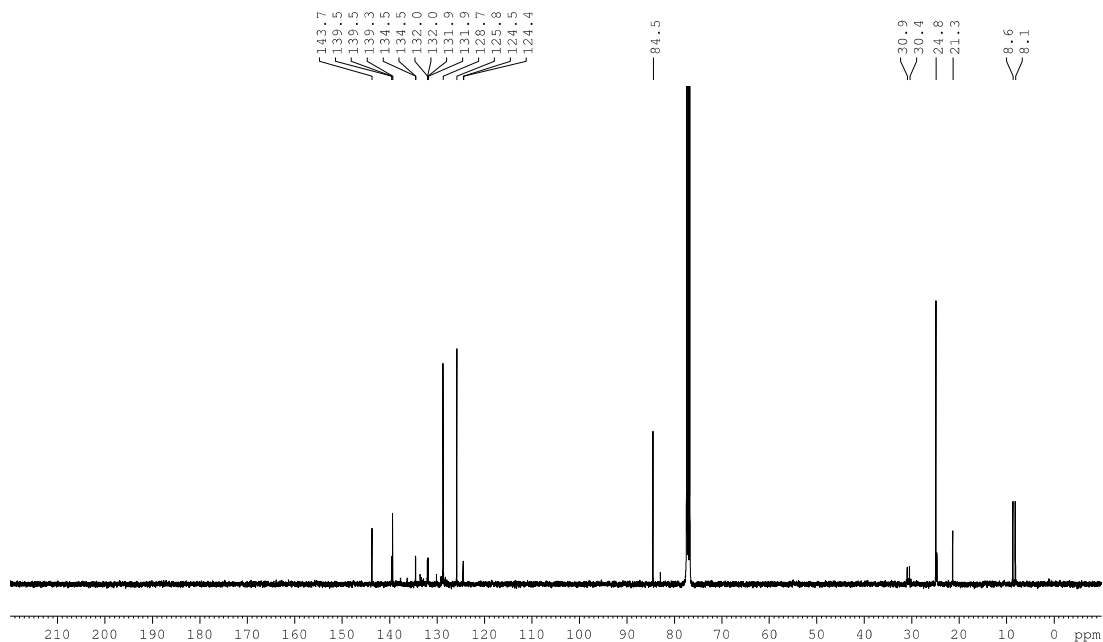

**Borylation of 3d w/ 1:  $^1\text{H}$  NMR (600 MHz,  $\text{CDCl}_3$ )**

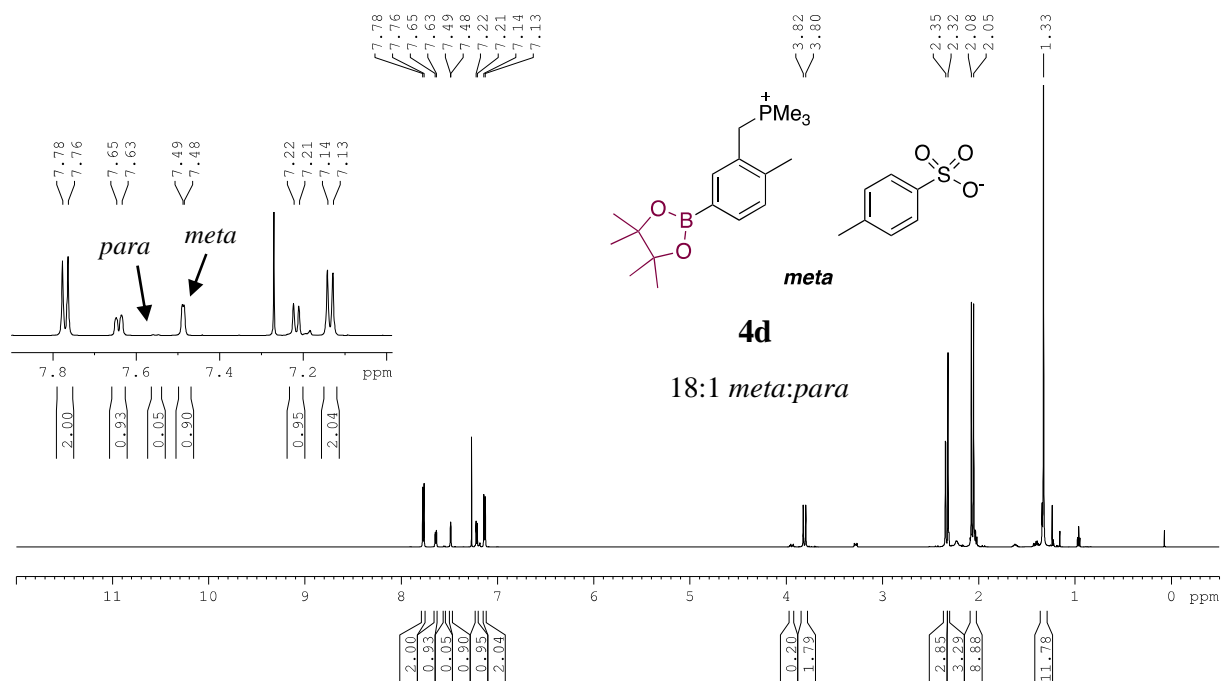

**Borylation of 3d w/ 1:  $^{13}\text{C}$  NMR (101 MHz,  $\text{CDCl}_3$ )**

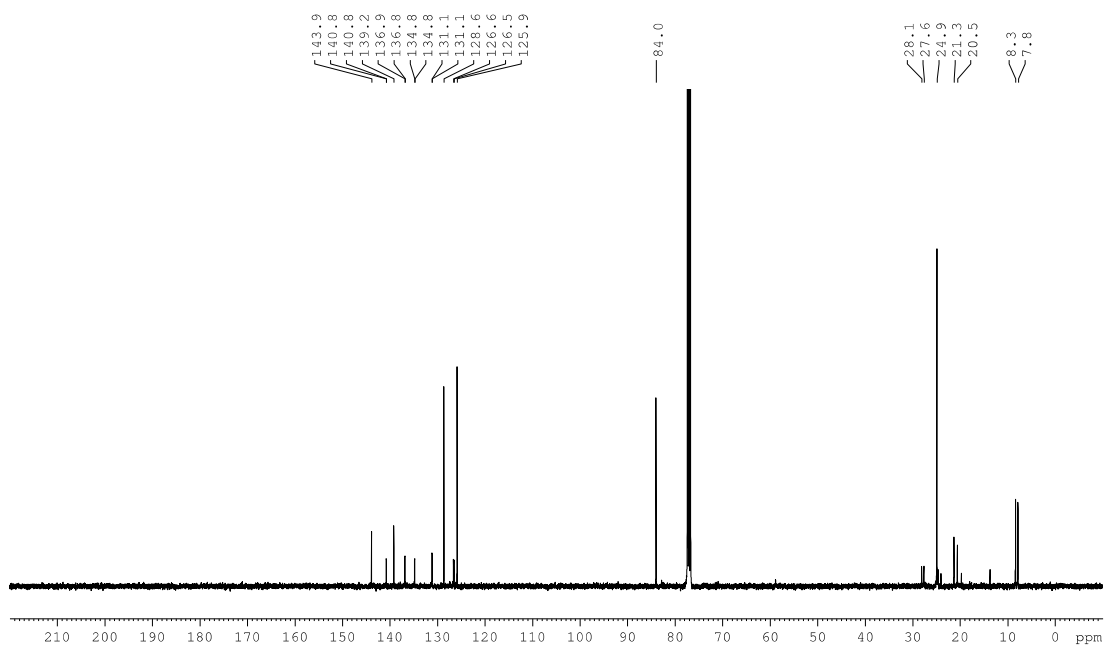

**Borylation of 3d w/ tmphen:  $^1\text{H}$  NMR (600 MHz,  $\text{CDCl}_3$ )**

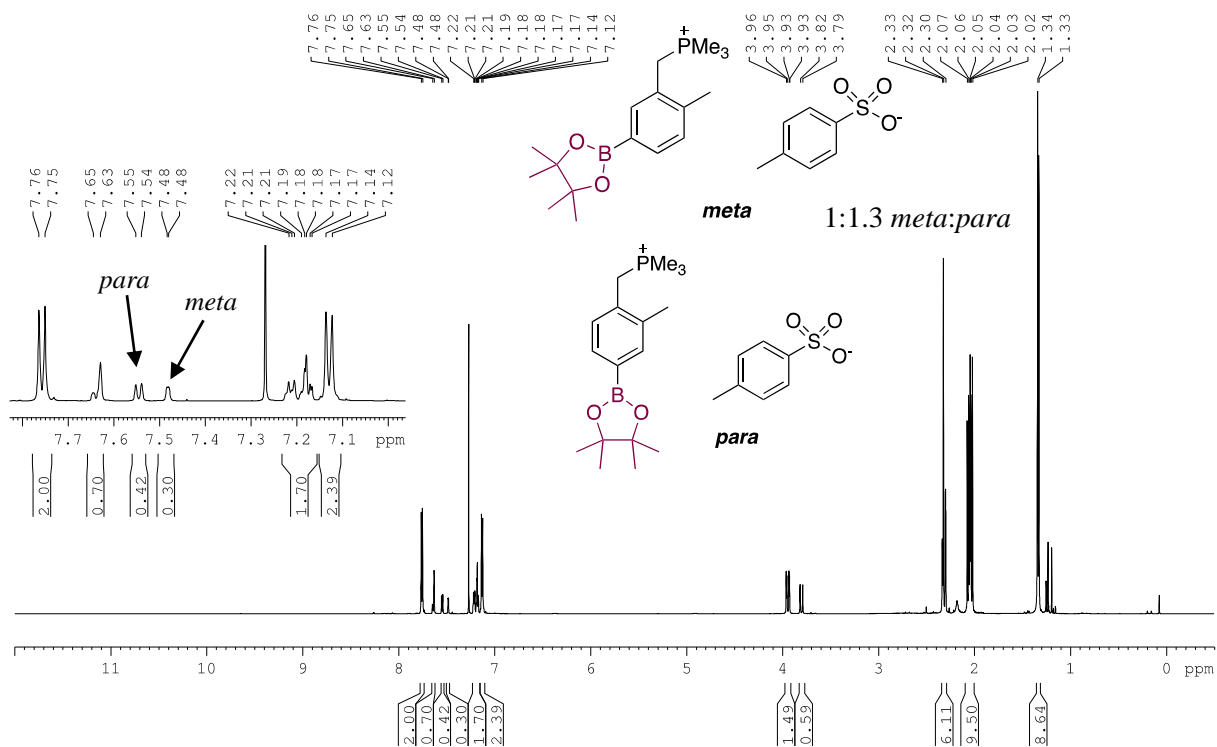

**Borylation of 3d w/ tmphen:  $^{13}\text{C}$  NMR (101 MHz,  $\text{CDCl}_3$ )**

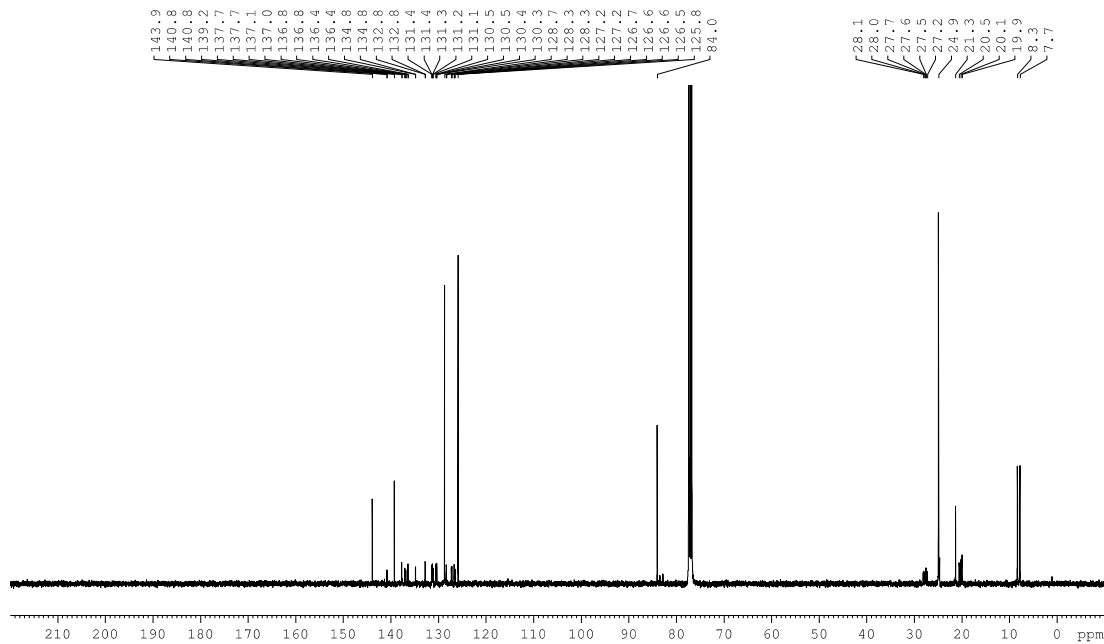

**Borylation of 3e w/ 1: <sup>1</sup>H NMR (600 MHz, CDCl<sub>3</sub>)**

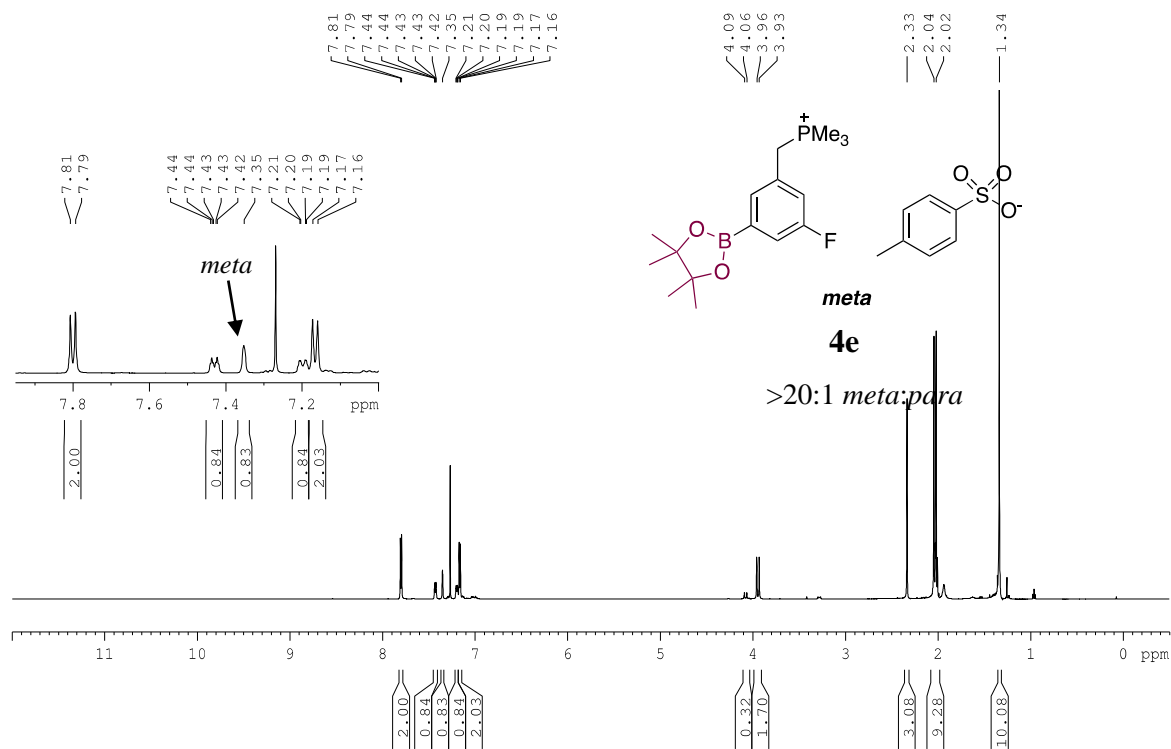

**Borylation of 3e w/ 1: <sup>13</sup>C NMR (101 MHz, CDCl<sub>3</sub>)**

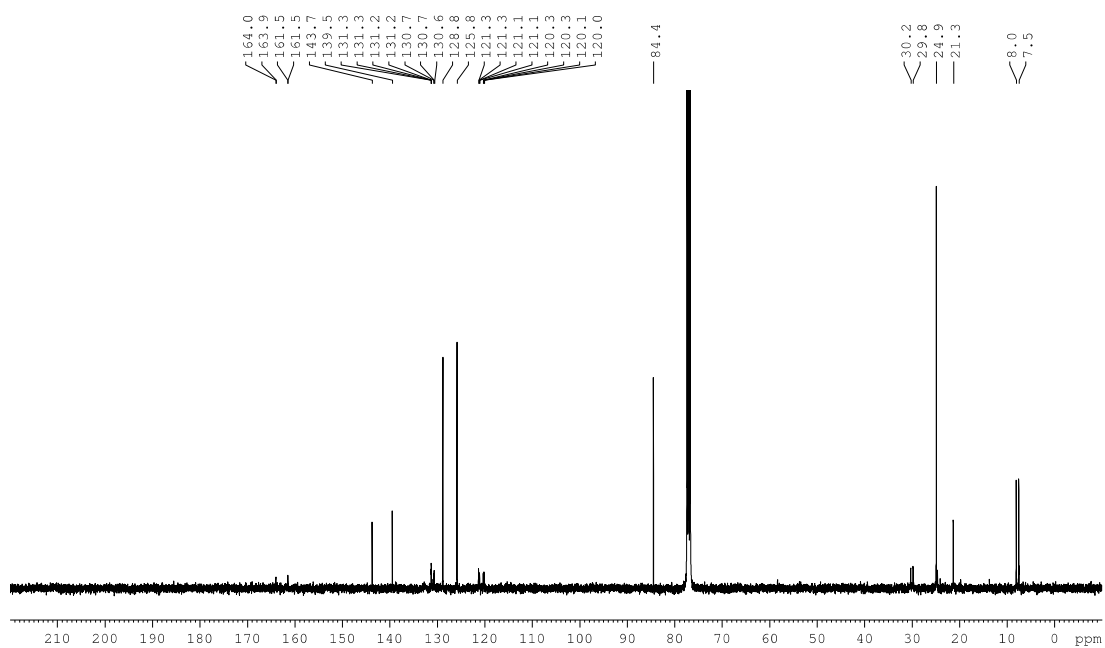

**Borylation of 3e w/ tmphen:  $^1\text{H}$  NMR (600 MHz,  $\text{CDCl}_3$ )**

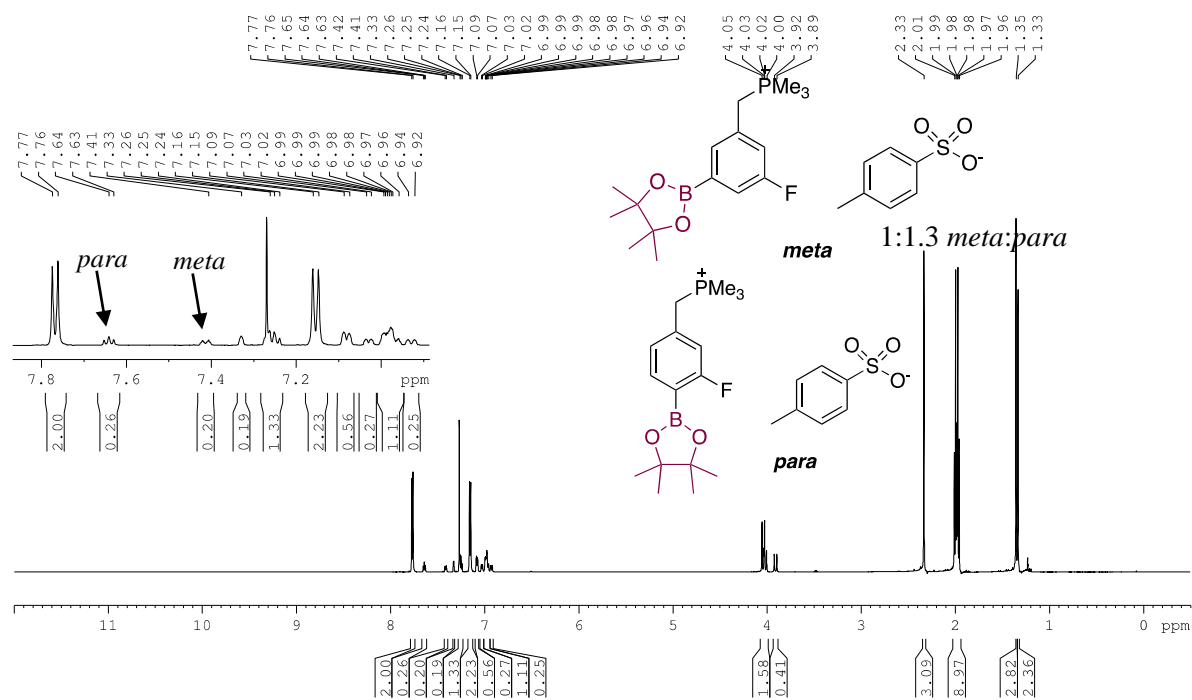

**Borylation of 3e w/ tmphen:  $^{13}\text{C}$  NMR (101 MHz,  $\text{CDCl}_3$ )**

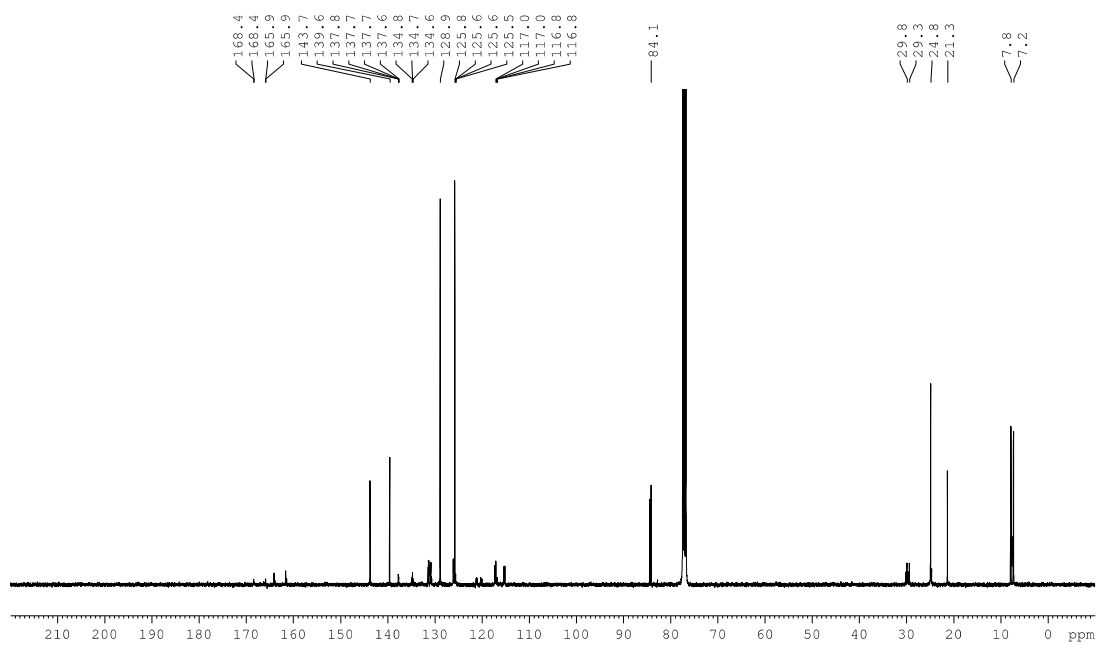

**Borylation of 3f w/ 1:  $^1\text{H}$  NMR (600 MHz,  $\text{CDCl}_3$ )**

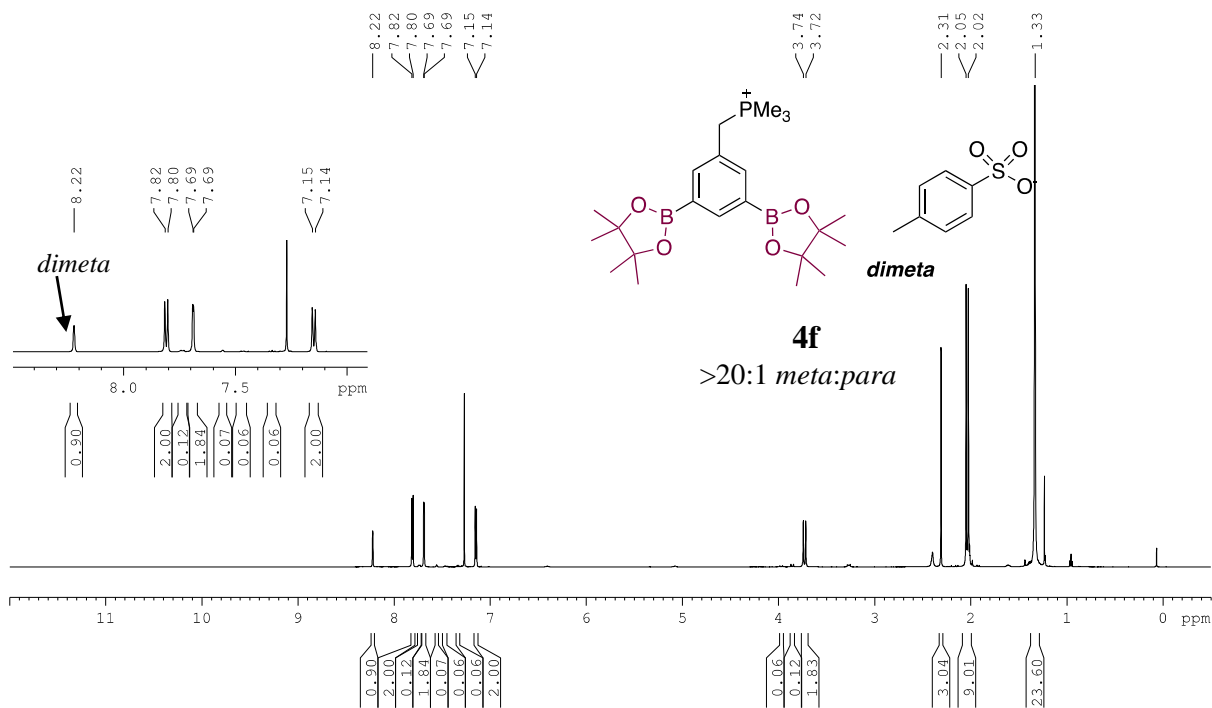

**Borylation of 3f w/ 1:  $^{13}\text{C}$  NMR (151 MHz,  $\text{CDCl}_3$ )**

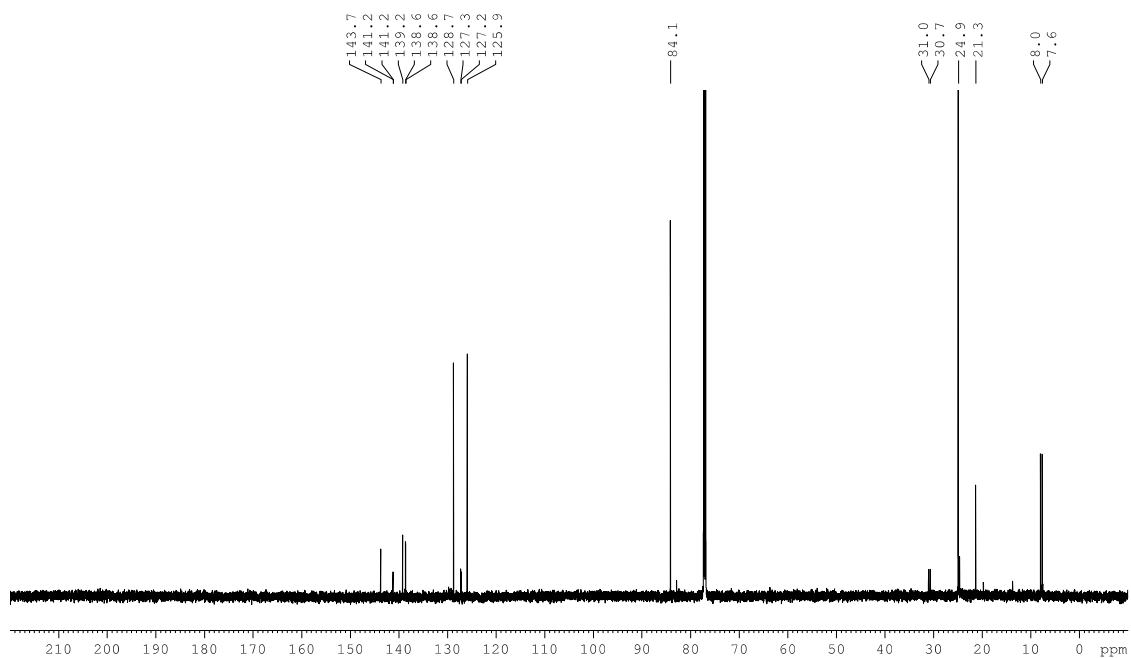



**Borylation of 5a w/ 1: <sup>1</sup>H NMR (400 MHz, CDCl<sub>3</sub>)**

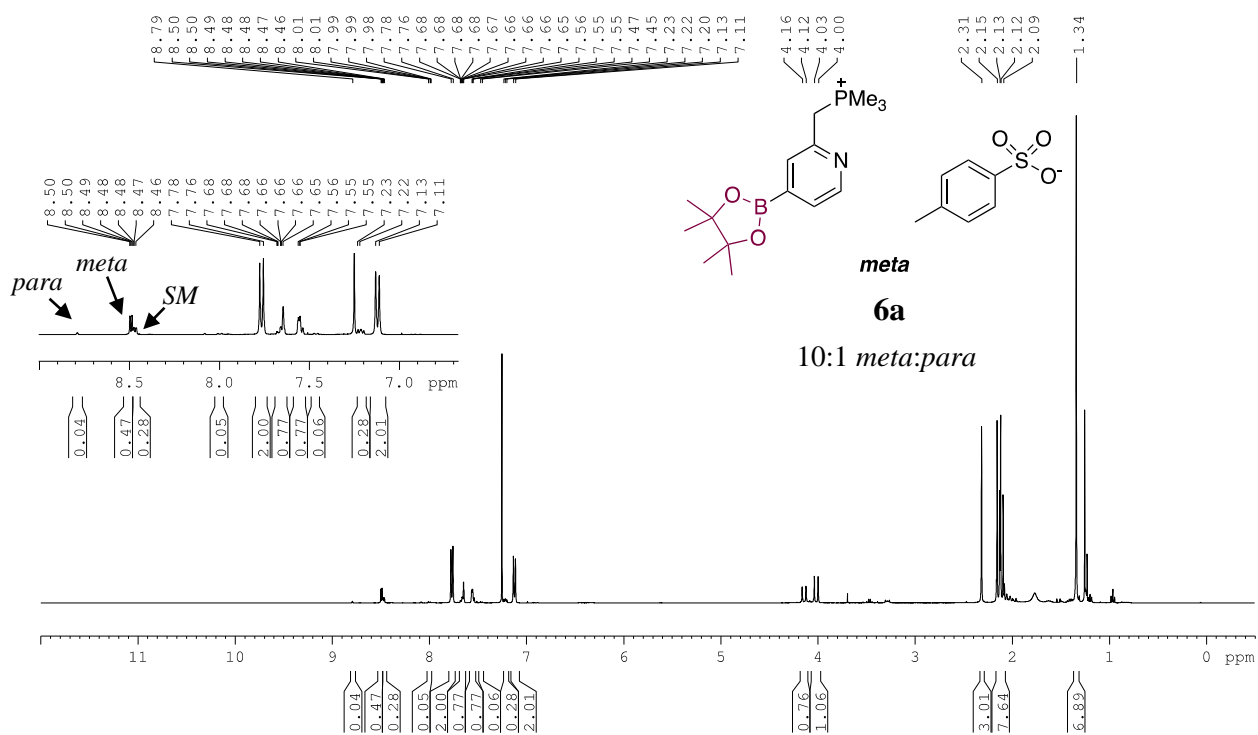

**Borylation of 5a w/ 1: <sup>13</sup>C NMR (101 MHz, CDCl<sub>3</sub>)**

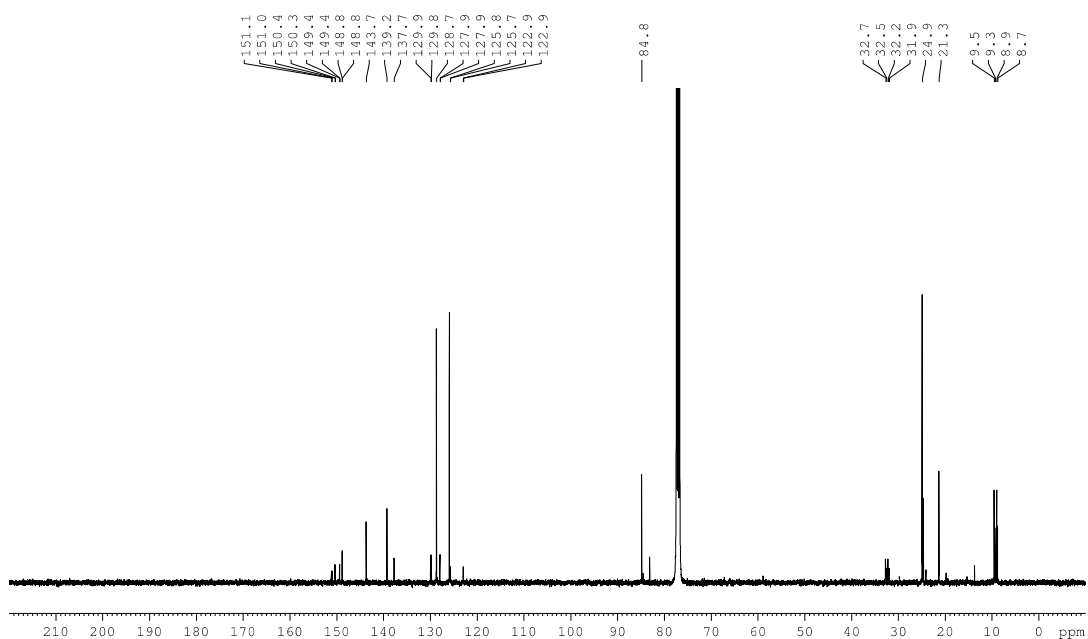

**Borylation of 5a w/ tmphen:  $^1\text{H}$  NMR (400 MHz,  $\text{CDCl}_3$ )**

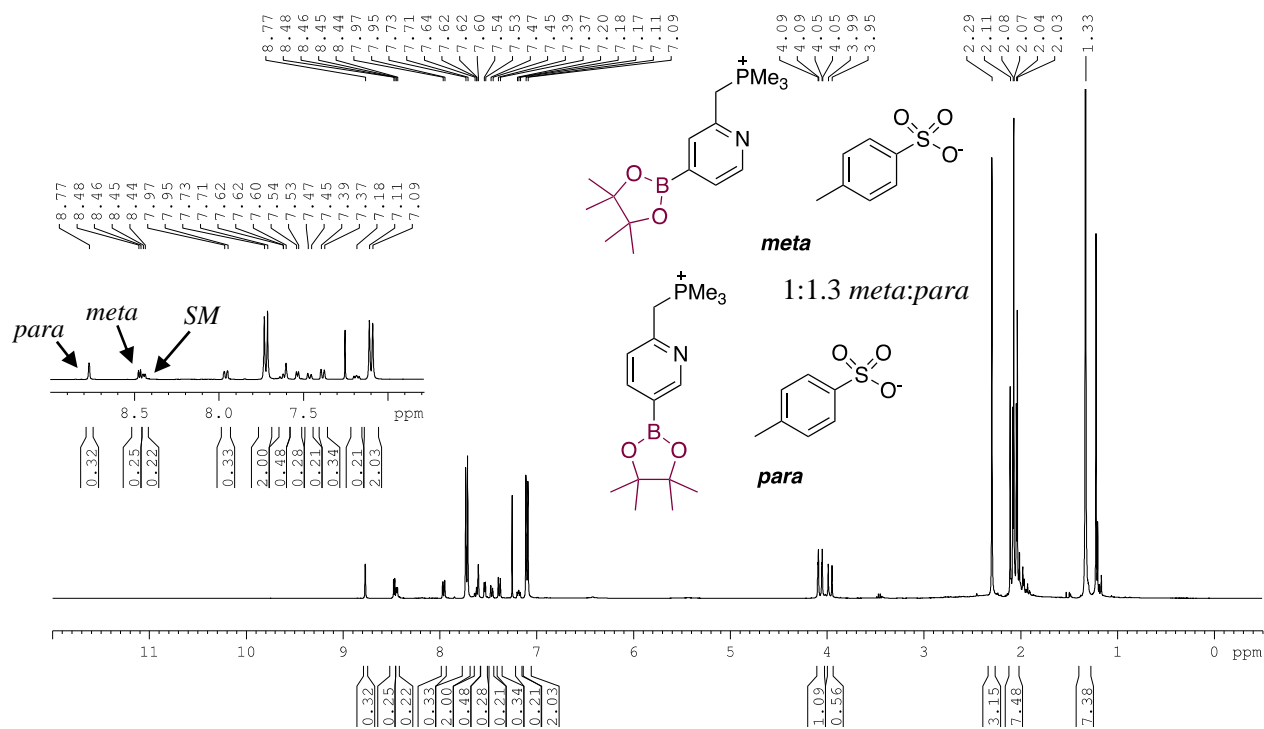

**Borylation of 5a w/ tmphen:  $^{13}\text{C}$  NMR (101 MHz,  $\text{CDCl}_3$ )**

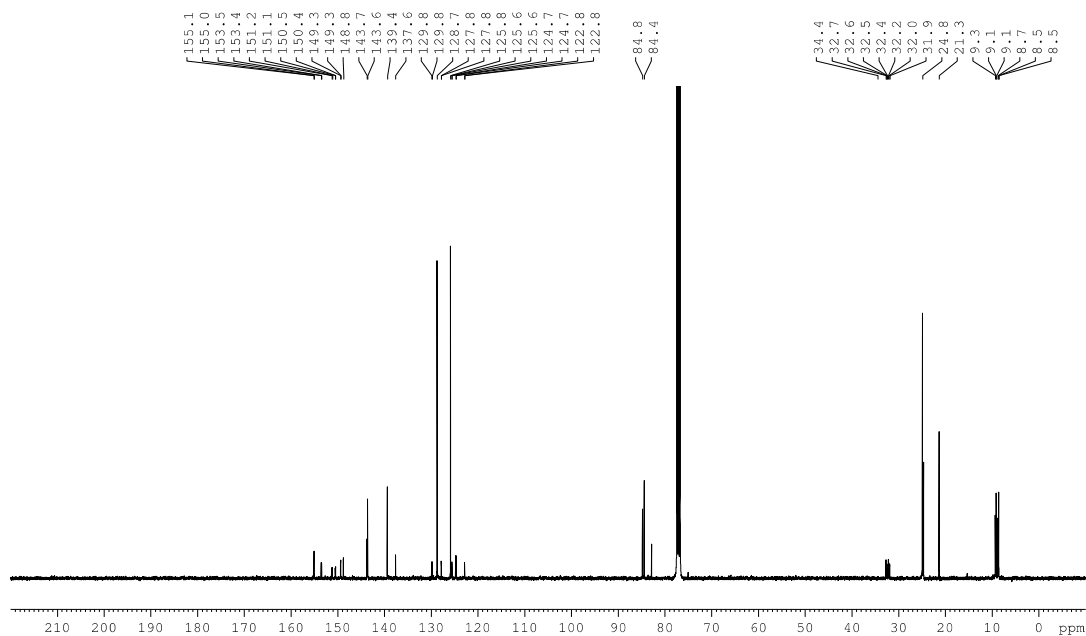

### 1.3 NMR data for Scheme 4

#### $^1\text{H}$ NMR (600 MHz, $\text{MeOD-}d_4$ )

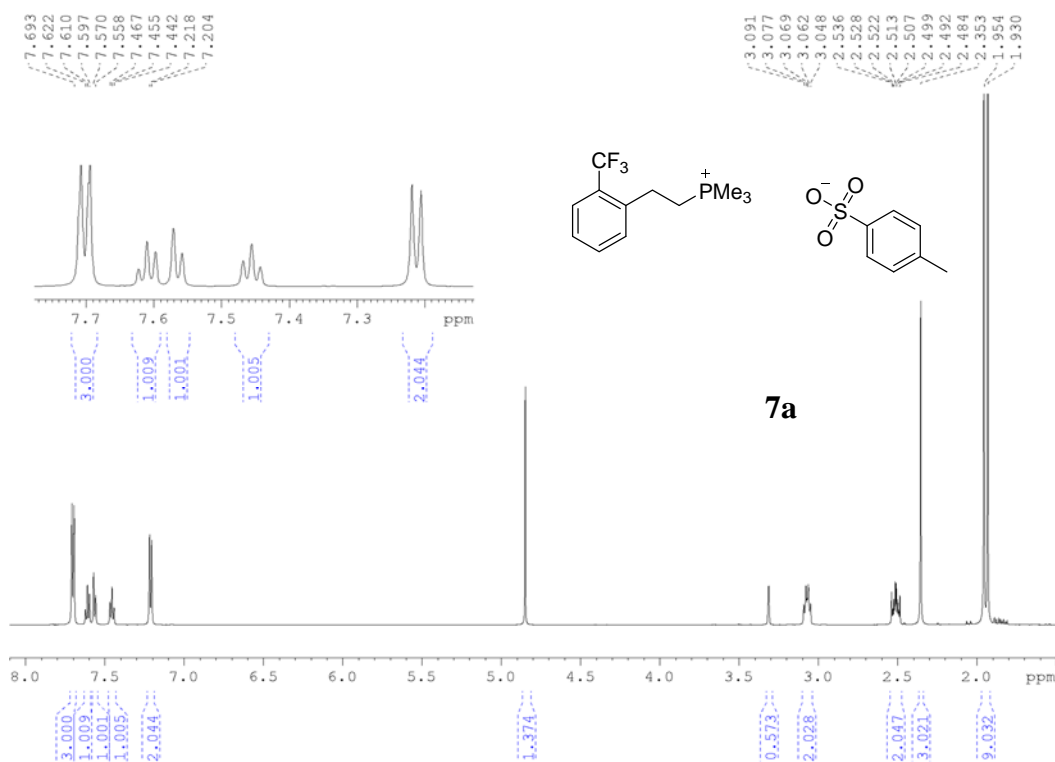

#### $^{13}\text{C}$ NMR (151 MHz, $\text{MeOD-}d_4$ )

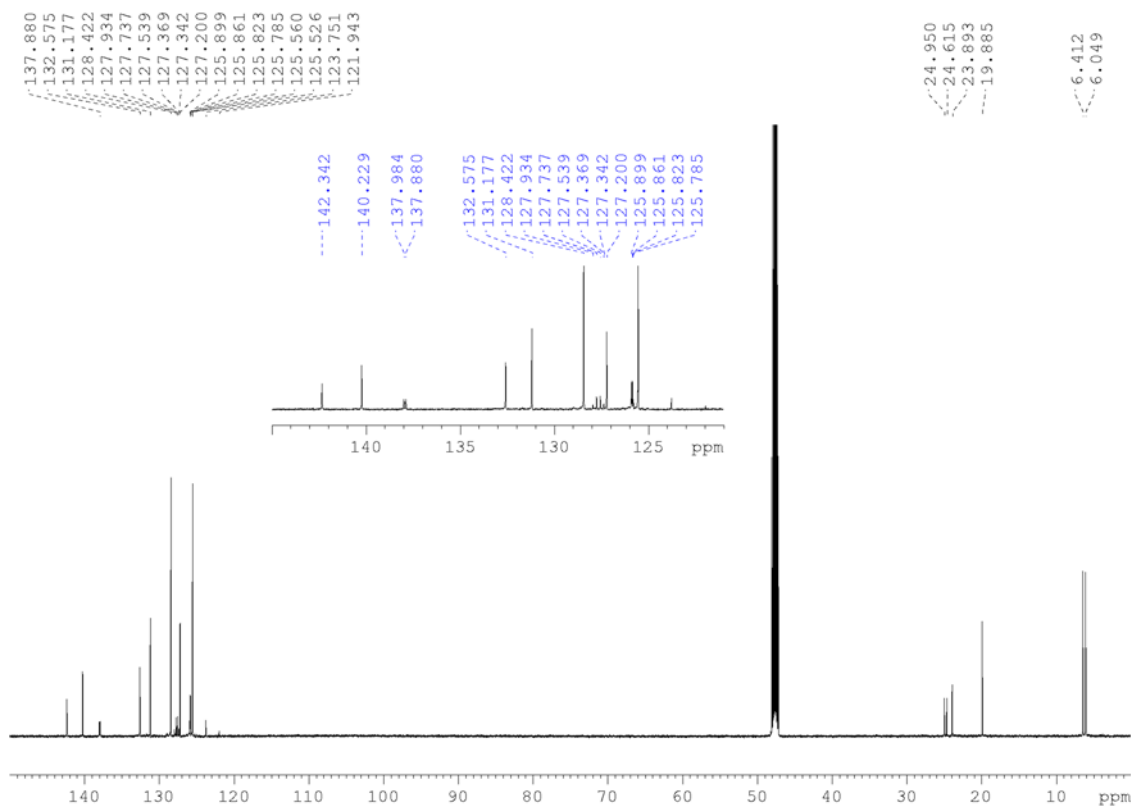

### $^1\text{H}$ NMR (600 MHz, $\text{MeOD-}d_4$ ) – Borylation with ligand 1

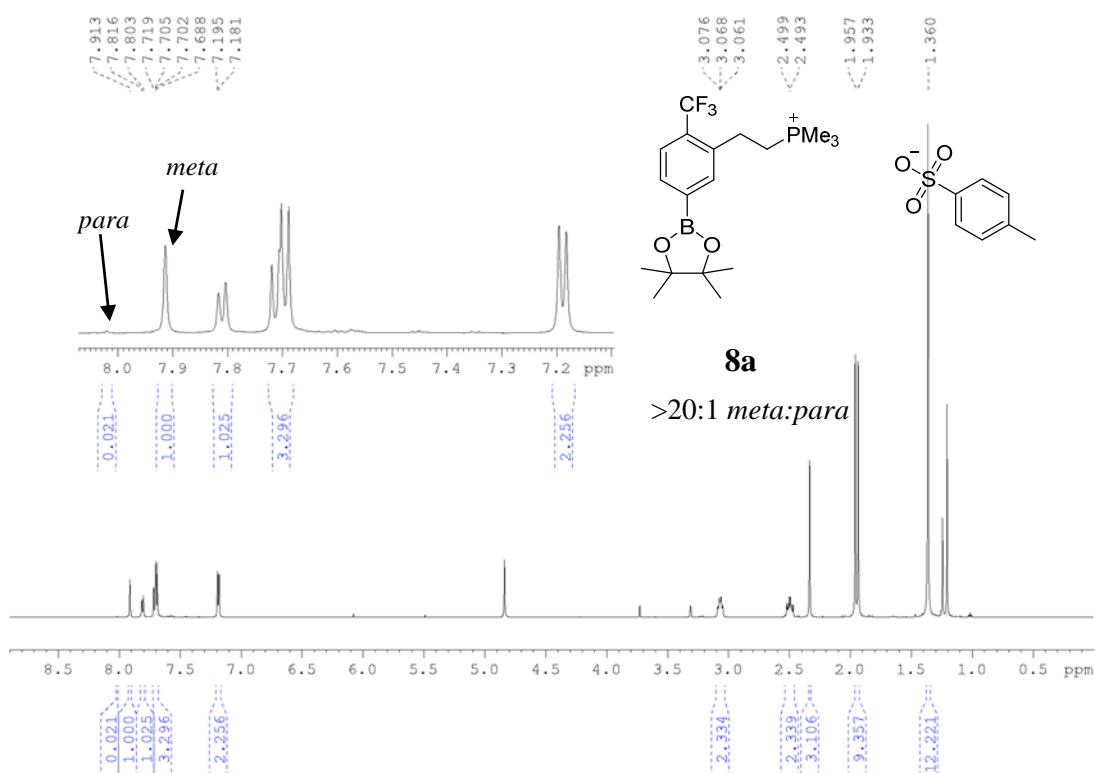

### $^{13}\text{C}$ NMR (151 MHz, $\text{MeOD-}d_4$ ) – Borylation with ligand 1

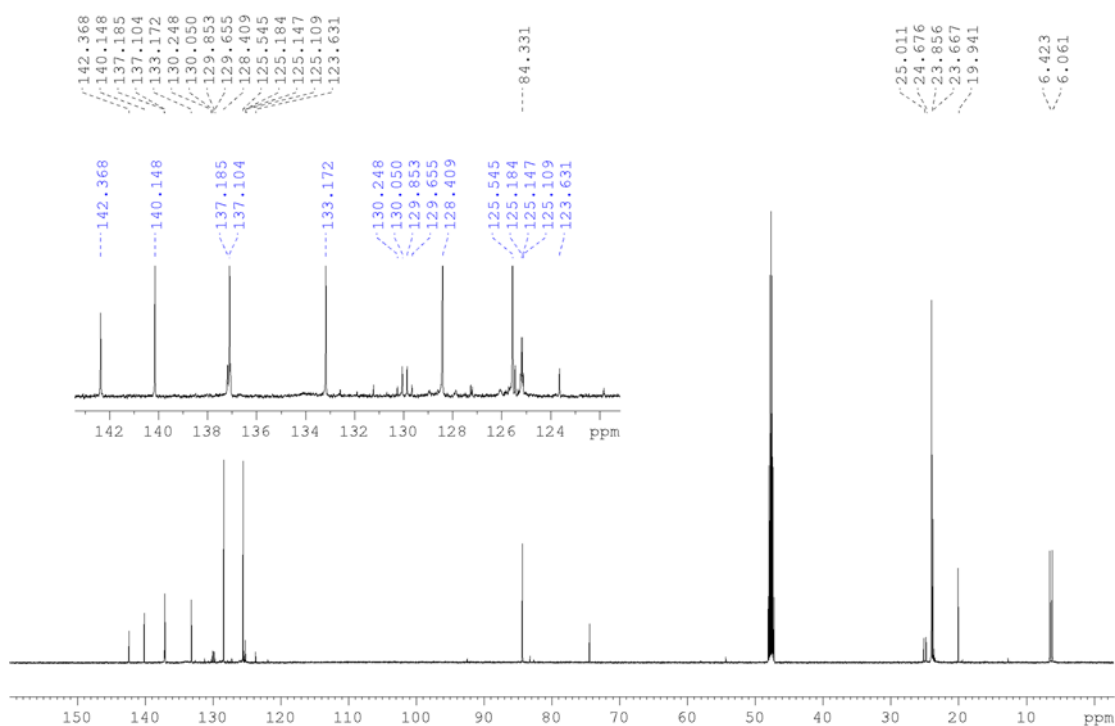

**<sup>1</sup>H NMR (600 MHz, MeOD-*d*<sub>4</sub>) – Borylation with tmphen – triturated sample**

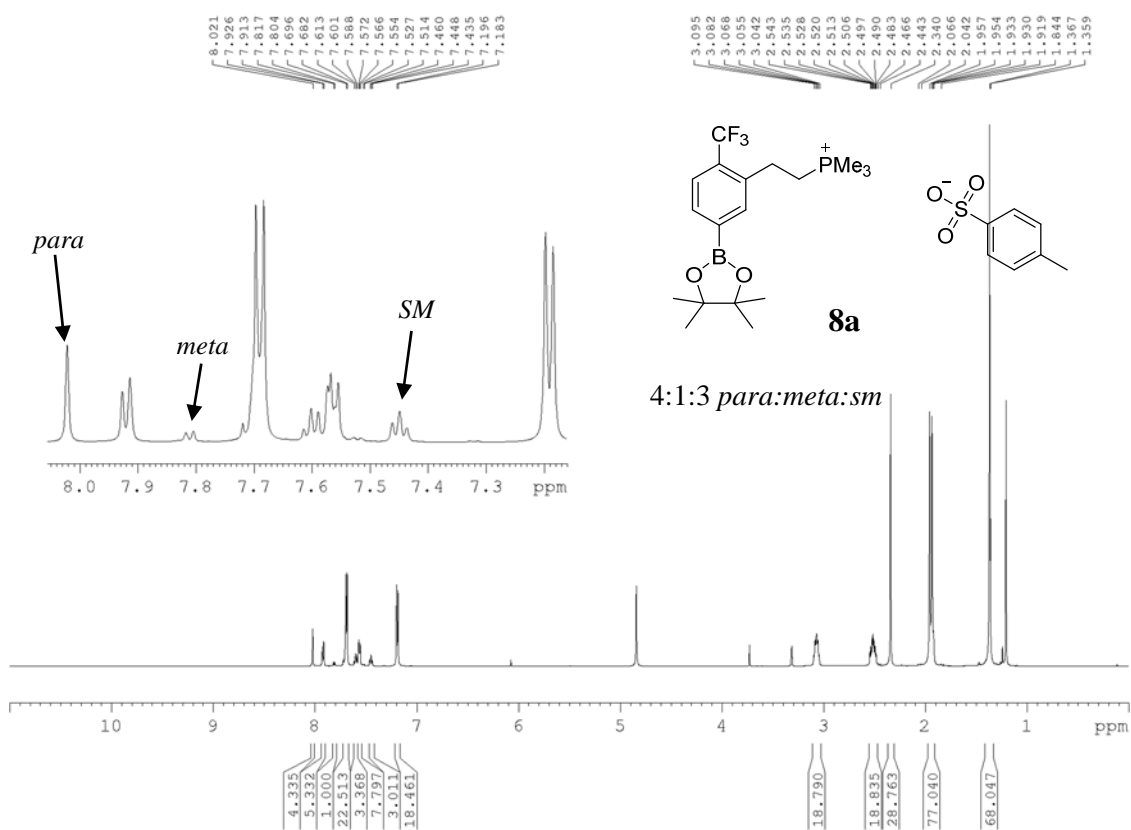

**<sup>13</sup>C NMR (151 MHz, MeOD-*d*<sub>4</sub>) – Borylation with tmphen – triturated sample**

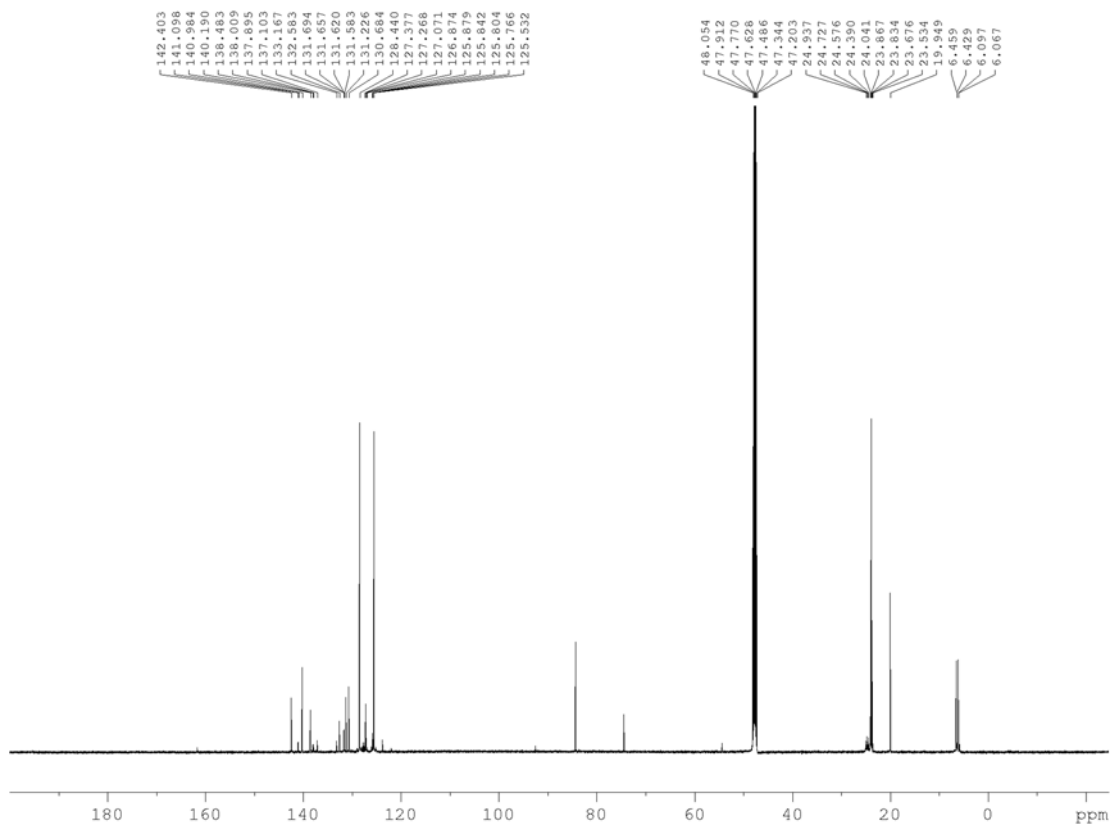

**<sup>1</sup>H NMR (400 MHz, CDCl<sub>3</sub>) – 7b**

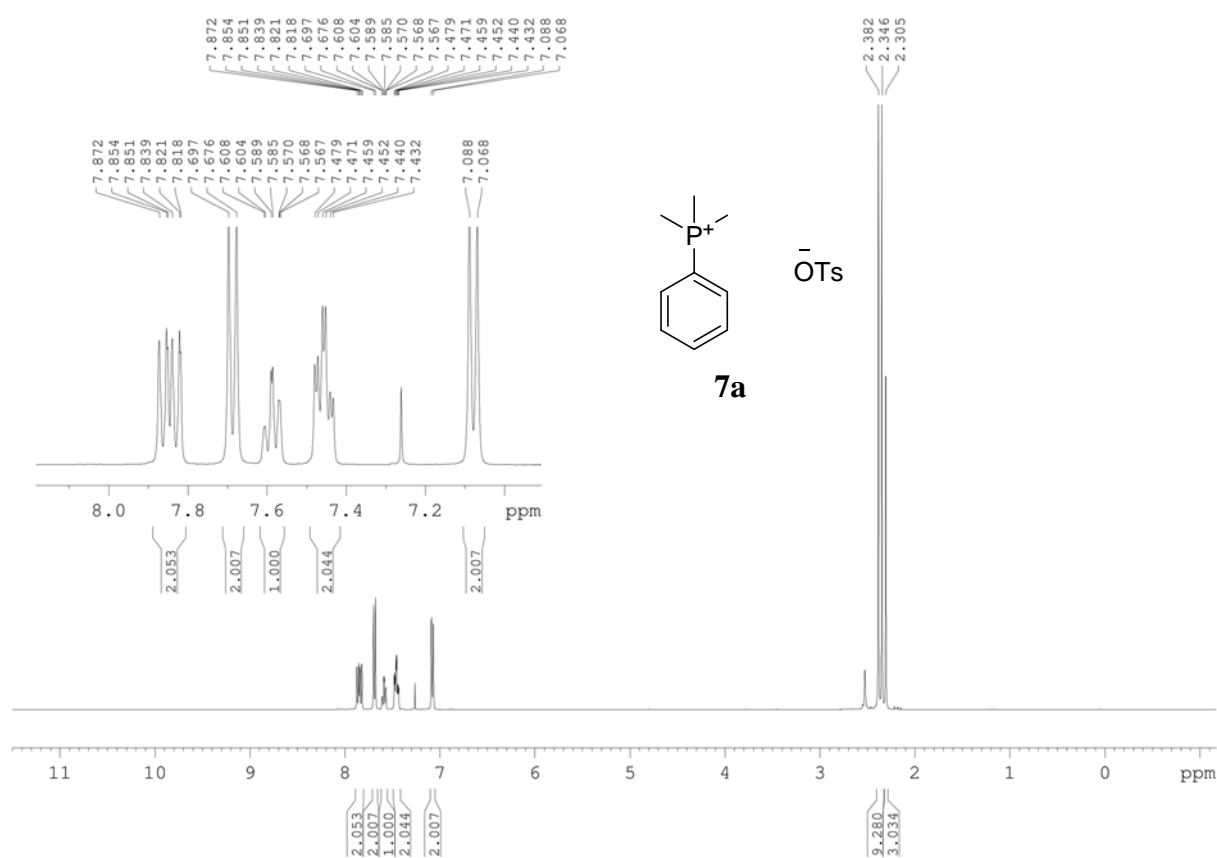

**<sup>13</sup>C NMR (101 MHz, CDCl<sub>3</sub>) – 7b**

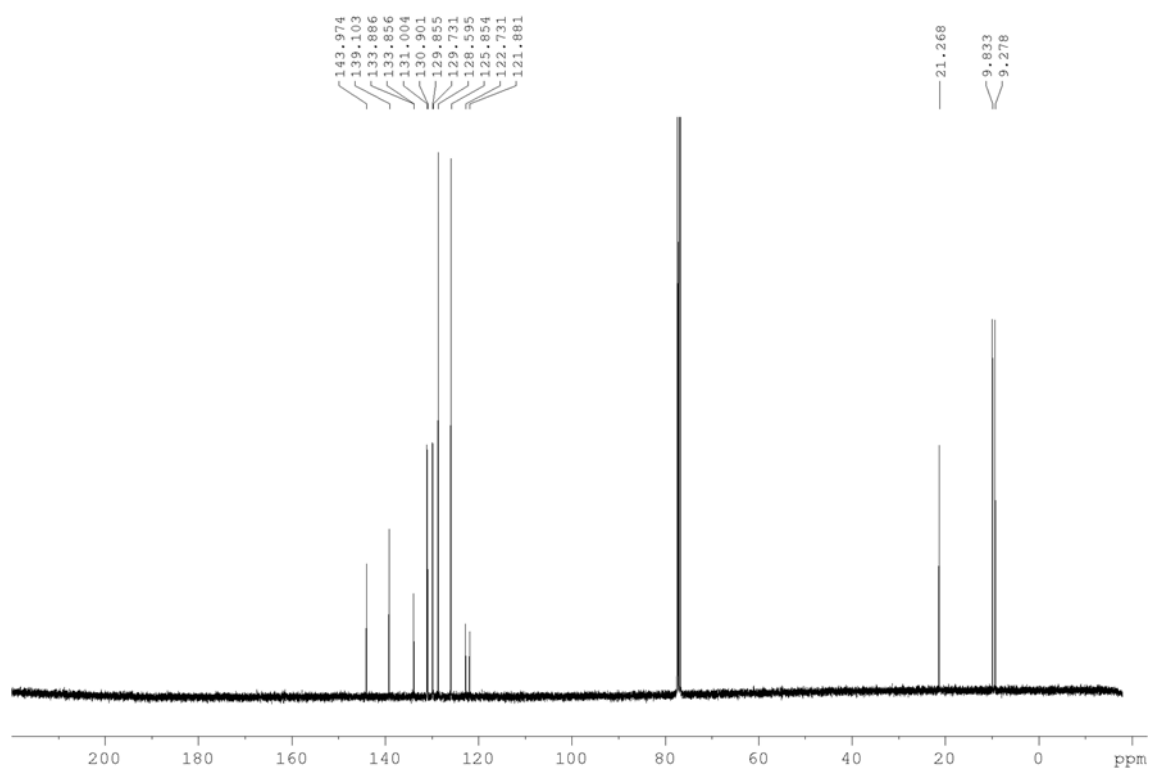

**<sup>1</sup>H NMR (400 MHz, CDCl<sub>3</sub>) – Borylation with ligand 1**

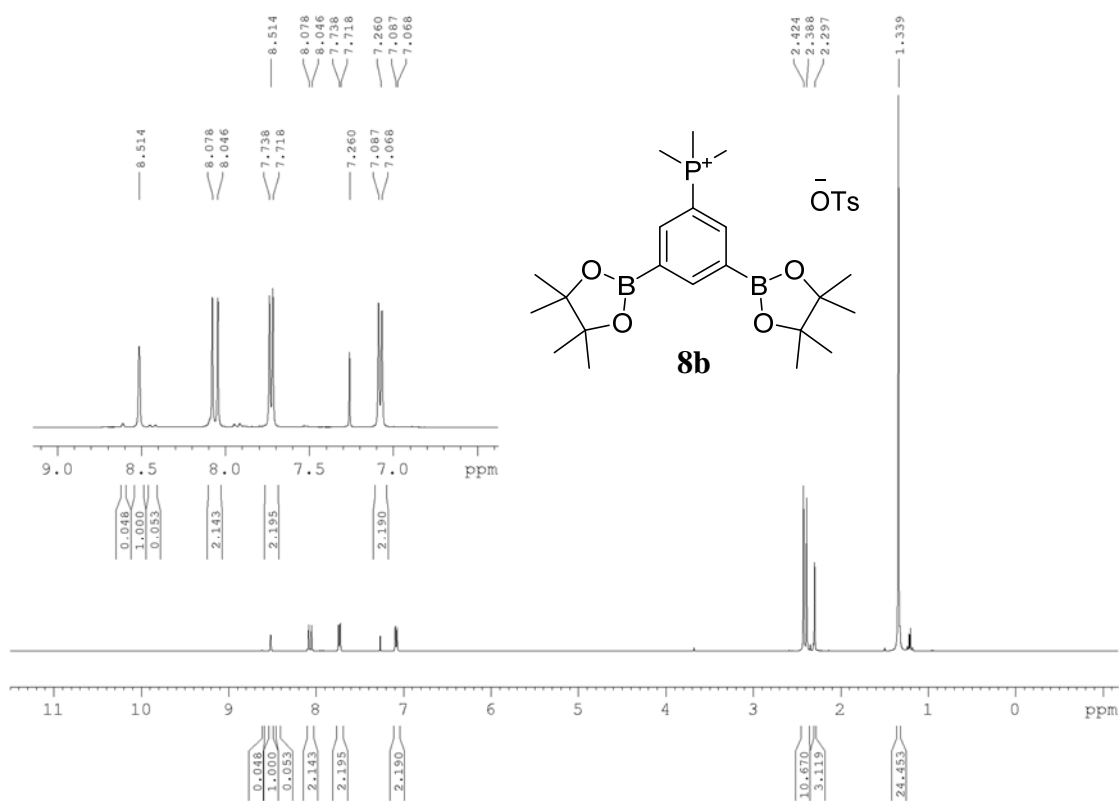

**<sup>13</sup>C NMR (101 MHz, CDCl<sub>3</sub>) – Borylation with ligand 1**

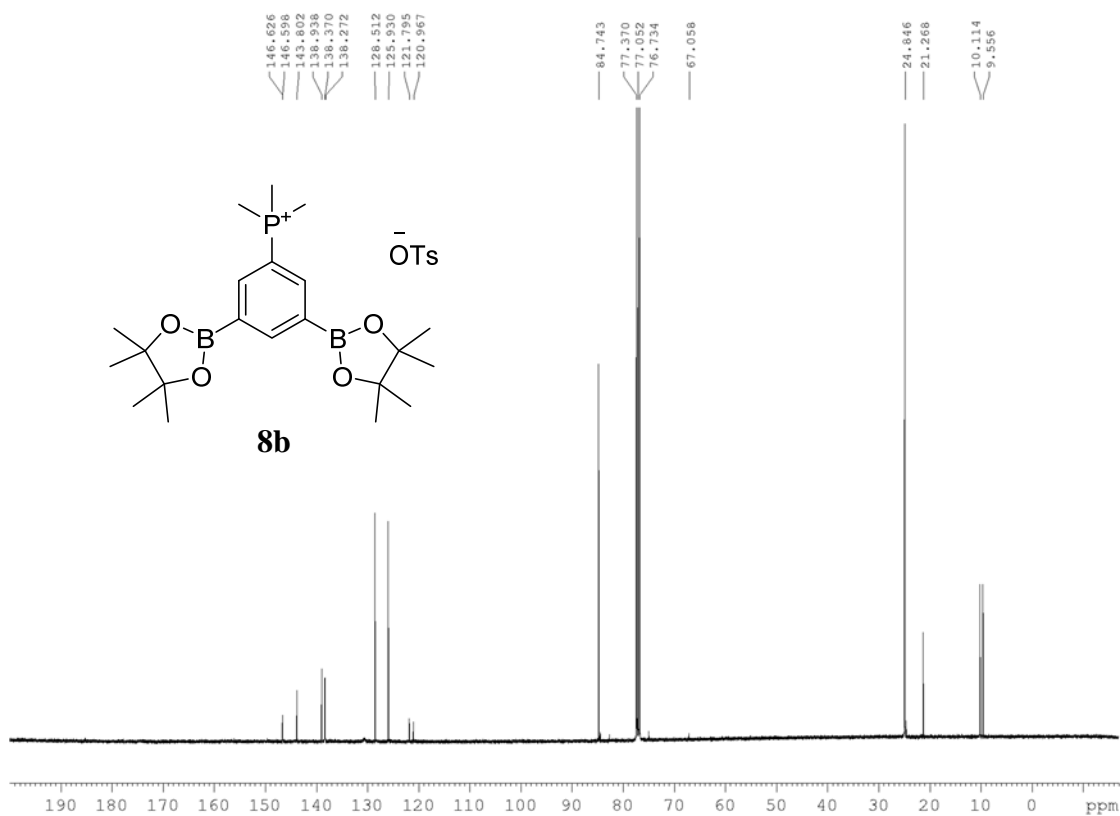

## 1.4 NMR data for Scheme 5

### $^1\text{H}$ NMR (400 MHz, $\text{CDCl}_3$ ) – 4-Chloro-3-methylphenol (9)

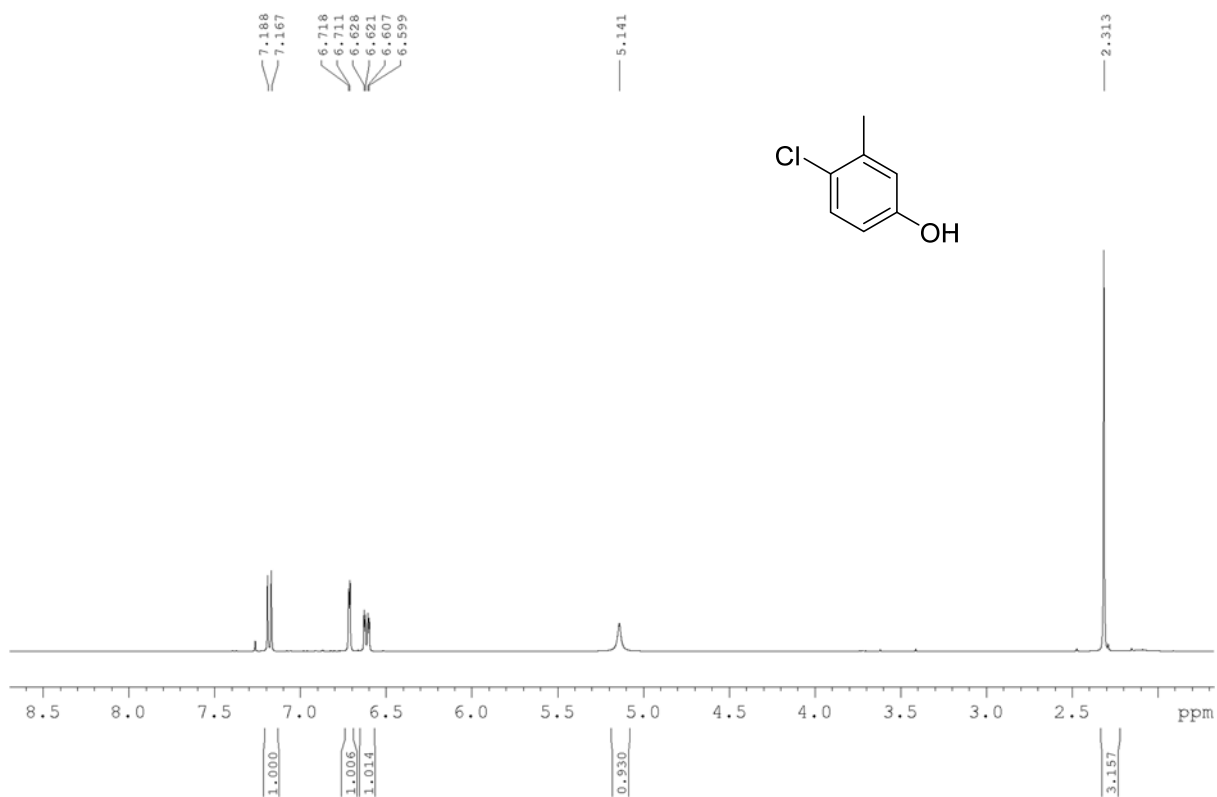

### $^{13}\text{C}$ NMR (101 MHz, $\text{CDCl}_3$ ) – 4-Chloro-3-methylphenol (9)

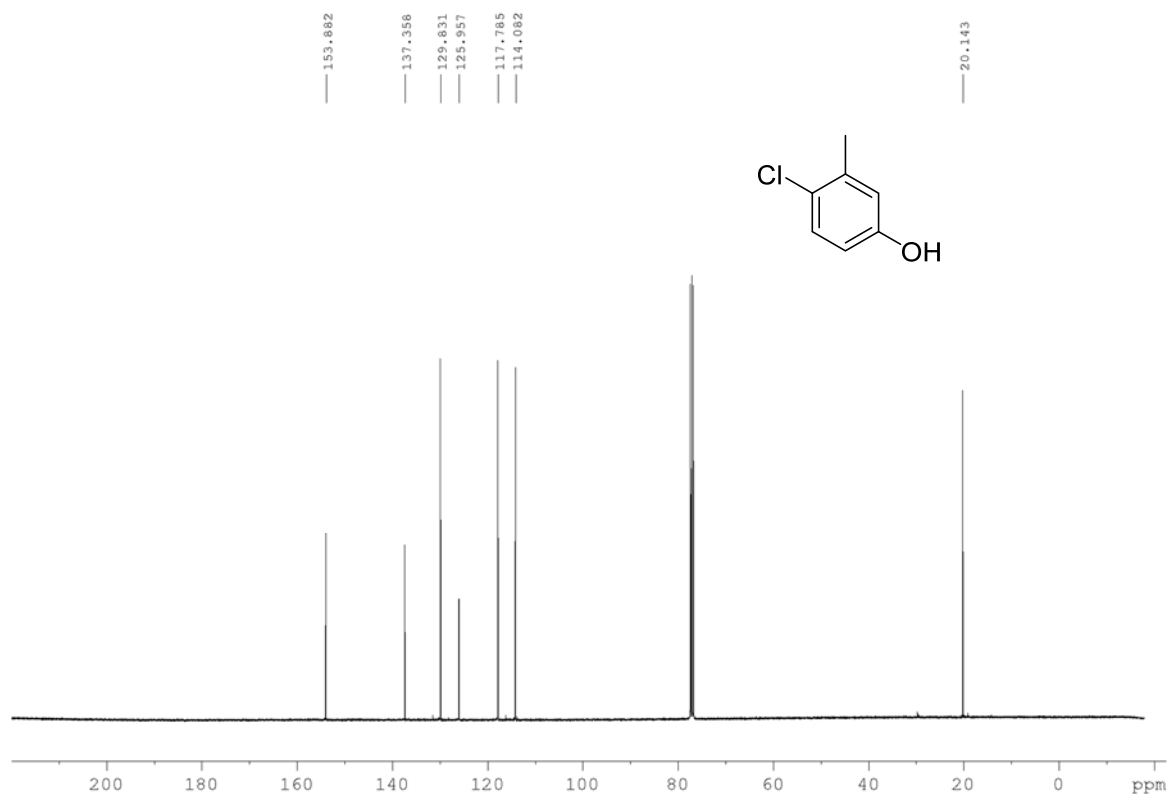

Supplement: jo9b00878_si_001.pdf [file jo9b00878_si_001.pdf]
